1 ***mtDNA recombination indicative of hybridization suggests a role of the mitogenome in the adaptation***  
2 ***of reef building corals to extreme environments***

3  
4 *Eulalia Banguera-Hinestroza*<sup>1,2\*</sup>, *Yvonne Sawall*<sup>3</sup>, *Abdulmohsin Al-Sofyani*<sup>4</sup>, *Patrick Mardulyn*<sup>2</sup>, *Javier*  
5 *Fuertes-Aguilar*<sup>5</sup>, *Heiber Cardenas-Henao*<sup>6</sup>, *Francy Jimenez-Infante*<sup>1</sup>, *Christian R. Voolstra*<sup>1\*\*</sup>, *Jean-*  
6 *François Flot*<sup>2\*\*</sup>

- 7  
8 1. Red Sea Research Center, King Abdullah University of Sciences and Technology  
9 (KAUST), Thuwal, Saudi Arabia.  
10 2. Ecology and Evolutionary Biology, Université libre de Bruxelles (ULB), Brussels.  
11 Belgium.  
12 3. Bermuda Institute of Ocean Sciences (BIOS), Coral Reef Ecology, Bermuda.  
13 4. Department of Marine Biology, Faculty of Marine Sciences, King Abdulaziz University  
14 (KAU), Jeddah, Saudi Arabia.  
15 5. Real Jardín Botánico, RJB-CSIC, Plaza de Murillo 2, 28014 Madrid, Spain.  
16 6. Universidad del Valle, Department of Biology. Group of Ecogenetics and Molecular  
17 Biology, Cali, Colombia.

18  
19 \*Corresponding author: [ebanguer@ulb.ac.be](mailto:ebanguer@ulb.ac.be); [eulalia.banguera@gmail.com](mailto:eulalia.banguera@gmail.com)

20 \*\* Equal contributions

21 **Abstract**

22

23 Introgressive hybridization, as evidenced by topological incongruence between nuclear and  
24 mitochondrial phylogenies, has been broadly recorded in a range of organisms. However, mtDNA  
25 recombination following hybridization is rarely found in animals and was never until now reported in  
26 reef-building corals. Here we report unexpected topological incongruence among mitochondrial markers  
27 in the phylogenetic analysis of *Stylophora* species distributed along broad geographic ranges, including  
28 the full latitudinal (2000 km) and environmental gradient (21°C-33°C) of the Red Sea. The analysis of  
29 *Stylophora* lineages in the framework of the mitogenome phylogenies of members of the family  
30 Pocilloporidae, coupled with analyses of recombination, shows the first evidence of asymmetric patterns  
31 of introgressive hybridization associated to mitochondrial recombination in this genus. Hybridization  
32 likely occurred between an ancestral lineage restricted to the Red Sea/Gulf of Aden basins and migrants  
33 from the Indo-Pacific/Indian Ocean that reached the Gulf of Aden. The resulting hybrid occurs in  
34 sympatry with the parental Red Sea lineage, from which it inherited most of its mtDNA (except the  
35 recombinant region that includes the *nd6*, *atp6* and *mtORF* genes) and expanded its range into the  
36 hottest region of the Arabian Gulf. Noticeably, across the Red Sea both lineages exhibit striking  
37 differences in terms of phylogenetic and phylogeographic patterns, clades-morphospecies association,  
38 and zooxanthellae composition. Our data suggest that the colonization of the Red Sea by the ancestral  
39 lineage, which involved overcoming the extreme temperatures of the southern Red Sea, likely resulted in  
40 changes in mitochondrial proteins, which led to its successful adaptation to the novel environmental  
41 conditions.

42

43 Key words: Introgressive hybridization, coral reefs, extreme environments, mtDNA recombination,  
44 mito-mito incongruence, mito-nuclear incongruence, *Stylophora*, Pocilloporidae, Red Sea.

## 45 1. INTRODUCTION

46

47 Studies of mitochondrial genomes have been of broad relevance for understanding the ecological and  
48 evolutionary processes leading to the diversification of organisms (Ballard and Rand, 2005; Chinnery  
49 and Hudson, 2013; Kivisild, 2015; Wolff et al., 2016), due particularly to key characteristics such as:  
50 maternal inheritance (in most organisms); high mutation rates in triploblastic metazoans (but not in  
51 cnidarians and poriferans; cf. Shearer et al. 2002); and lack of recombination (Barr et al., 2005).

52 However, the latter assumption has been challenged by the increasing evidence of mtDNA  
53 recombination in animals (Barr et al., 2005; Ladoukakis and Zouros, 2017; Rokas et al., 2003; Tsaousis  
54 et al., 2005; Ujvari et al., 2007) with important ecological and evolutionary implications (Dokianakis  
55 and Ladoukakis, 2014; Levsen et al., 2016; Passamonti et al., 2013; Rokas et al., 2003; White et al.,  
56 2008).

57

58 In natural populations, most evidence for mtDNA and/or nuclear introgression comes from species  
59 living at the edge of their geographic range (i.e. marginal ecosystem that often exhibit genetically  
60 atypical populations; Johannesson and André, 2006), perturbed habitats, near extreme environmental  
61 conditions or in hybrid zones (Brennan et al., 2014; Hellberg et al., 2016; Johannesson and Carl, 2006;  
62 Riginos and Cunningham, 2004; Taylor et al., 2015). There is growing evidence in plants, in fungi, and  
63 to a lesser extent in animals, that divergent lineages that meet and interbreed in contact zones,  
64 particularly after expanding their range as a consequence of climatic or habitat fluctuations, produce  
65 hybrids carrying recombinant mitochondrial genomes (Barr et al., 2005) that are able to adapt to new  
66 environmental or habitat conditions leading eventually to hybrid speciation (Brennan et al., 2014;  
67 Mastrantonio et al., 2016; Riginos and Cunningham, 2004; Taylor et al., 2015).

68

69 Marginal areas such as the Red Sea, a biogeographic *cul-de-sac* extending from the Indian Ocean, are  
70 observed to host a high number of hybrid species (Berumen et al., 2017; DiBattista et al., 2016a;  
71 Garzón-Ospina et al., 2012; Johannesson and Carl, 2006; Veron, 1995) and therefore offer an interesting  
72 playground to study the main factors influencing patterns of diversification and hybrid speciation in  
73 extreme environments. The Red Sea ocean basin exhibits a high variability in oceanographic conditions  
74 following a N-S gradient along four well-defined oceanographic provinces (Raitsos et al., 2013), ranging  
75 from relatively low temperatures in the northern areas (below 23°C ) to record summer temperatures up

76 to 33°C in the southern region (Acker et al., 2008; Moustafa et al., 2014; Raitzos et al., 2013; Sawall et  
77 al., 2015, 2014).

78  
79 In addition, since its inception this region has undergone a complex climatic and geological history.  
80 During the last glacial cycles, the Red Sea experienced multiple sea-level fluctuations (Rohling et al.,  
81 2013; Siddall et al., 2003) as well as repetitive periods of connection and isolation from the Indo-Pacific,  
82 through the Strait of Bab-el-Mandeb in the South (Righton et al., 1996; Rohling et al., 2013; Siddall et  
83 al., 2004). These events, together with discontinuous periods of extinction and re-colonization from  
84 refuge zones inside and outside the region (Fine et al., 2013; Pellissier et al., 2014), likely played an  
85 important role in shaping the geographic distribution of genetic diversity for coral reefs in this oceanic  
86 basin, as well as the diversification of their associated fauna (Berumen et al., 2017; DiBattista et al.,  
87 2016a, 2016b, 2013). In fact, it has been postulated that corals entered the region during the Miocene –a  
88 period characterized by hyper-saline conditions and strong climate change – and after several episodes  
89 of post-Miocene migrations (Taviani, 1998). Lineages already inhabiting this area were affected by the  
90 successive geological and climatic processes influencing the region (DiBattista et al., 2016a). Repetitive  
91 invasions from the Indian Ocean likely enhanced the potential for the encounter of lineages with  
92 different genetic backgrounds, increasing the chance for hybridization and therefore hybrid speciation in  
93 the unique conditions of this marine zone.

94  
95 Introgressive hybridization has been reported to be widespread in reef-building corals, with records  
96 mostly in the families Acroporidae, Poritidae and Pocilloporidae (Combosch and Vollmer, 2015;  
97 Forsman et al., 2017; Hellberg et al., 2016; Johnston et al., 2017; Richards and Hobbs, 2015; Van Oppen  
98 et al., 2001; Willis et al., 2006). Indeed, the topological incongruence observed in coral phylogenies  
99 might be explained by reticulate evolution due to multiple climatic and sea-level changes across  
100 geological eras (Van Oppen et al., 2001; Veron, 1995; Vollmer and Palumbi, 2002; Willis et al., 2006).  
101 Moreover, it has been proposed that many species occurring in marginal areas and with restricted  
102 distribution, such as those endemic of the Indo-Pacific Ocean, might be hybrids (Richards and Hobbs,  
103 2015; Veron, 1995). Even though mtDNA introgression is expected to be more frequent than nuclear  
104 introgression, particularly between species occurring in sympatry (Mastrantonio et al., 2016), it has not  
105 being reported to date in reef-building corals.

106 The coral genus *Stylophora* (family Pocilloporidae) is widely distributed in the Indo-Pacific and Indian  
107 Ocean and comprises a range of a highly plastic morphospecies (Veron, 1995, 2002), which are  
108 diversified within four phylogenetic lineages (Flot et al., 2011; Keshavmurthy et al., 2013; Stefani et al.,  
109 2011). *Stylophora* is found throughout the entire environmental range of the Red Sea and is represented  
110 by several morphospecies: *Stylophora pistillata* (Esper, 1797), *Stylophora subseriata* (Ehrenberg, 1834),  
111 *Stylophora wellsi* (also found in Madagascar), *Stylophora kuelhmanni*, *Stylophora danae* and *Stylophora*  
112 *mamillata* (Scheer and Pillai, 1983; Veron, 2002). A recent molecular study aiming to identify species  
113 boundaries in the genus (Arrigoni et al., 2016) proposes that all these morphospecies belong to one  
114 single cohesive molecular lineage.

115

116 Here, we studied the genetic variation of coral species within the genus *Stylophora* and their associated  
117 zooxanthellae across the environmental gradients of the Red Sea, spanning over ~2000Km (12 degrees of  
118 latitude), and included sequences from other relevant biogeographic regions (i.e. New Caledonia, Great  
119 Barrier Reef, Madagascar, Gulf of Aden and Arabian Gulf). A total of 827 sequences were analyzed to  
120 understand their genetic diversity, phylogenetic patterns and phylogeographic framework, in addition 281  
121 colonies were typified for *Symbiodinium*. We selected this genus given its widespread geographical  
122 distribution in the Indo-Pacific region and the presence of several endemic morphospecies in the Red Sea  
123 (Veron et al., 2018), which may represent important sources of genetic variability for the future adaptation  
124 of reef-building corals under the current threats of climate changes. Our molecular markers included ITS2  
125 for *Symbiodinium* and four nuclear (*hsp70*, ITS1, ITS2 and *PMCA*) and five mitochondrial genes for the  
126 coral host (mtCR, *cox1*, 12S, 16S and mtORF). Among these markers, the hypervariable mtORF, a  
127 mitochondrial open reading frame of unknown function, which is unique to the family Pocilloporidae (Flot  
128 and Tillier, 2007a), has been proposed as an alternative barcode for members of this family, performing  
129 as well as NGS sequencing data for distinguishing species (i.e RAD-seq markers; Johnston et al., 2017).  
130 But some authors such as Chen et al. (2008) considers the mtORF as the control region, resulting in some  
131 confusion in the literature.

132

133 Subsequently, the patterns of diversification of the Red Sea specimens were evaluated using full  
134 mitochondrial genome sequences of species belonging to the family Pocilloporidae (*Pocillopora*,  
135 *Seriatopora*, *Stylophora* and *Madracis*) (Veron and Pichon 1976). Our aims were (1) to investigate  
136 patterns of diversification in *Stylophora* species and their associated zooxanthellae within the Red Sea and

137 verified further whether host morphological variation had any taxonomic value for these species (in other  
138 words, is there any association between morphological and genetic variation?). (2) to find out whether  
139 mitochondrial variation and phylogeographic patterns fit the trends expected from the environmental  
140 gradients in this marginal basin, and (3) to test whether the topological incongruence between mtDNA  
141 markers observed in our data and previously reported by Arrigoni et al. (2016) could be explained by  
142 introgressive hybridization. Here we discuss our results from an integrative perspective, coupling  
143 phylogenetic and phylogeographic patterns, *Symbiodinium* distribution, morphospecies-clades association  
144 and the finding of mtDNA recombination. We discuss the implications of these results for coral  
145 conservation in highly variable environments.

146

## 147 **2. MATERIAL AND METHODS**

148

### 149 **2.1. Coral Sampling**

150

151 We sampled a total of 725 colonies of *Stylophora* at 25 locations along the Red Sea coast in 2011 and  
152 2012 from the Gulf of Aqaba in the North (Maqna, 28° 31' 34.20 N, 34° 48' 14.30" E) to Farasan Island  
153 in the South (16° 31' 38.5" N, 42° 01' 54.09" E). Our sampling design covered the entire environmental  
154 gradient (Temperature: ~21 in the north to ~33°C in the south; Salinity: 41 PSU in the north to 37 PSU  
155 in the south) of the Red Sea and the four oceanographic provinces as defined in Raitsois et al. (2013;  
156 Figure 1 and Supplementary Table *SI*). Colonies were determined to belong to morphotypes of *S.*  
157 *pistillata*, *S. subseriata*, *S. danae*, *S. kuelhmanni* and *S. wellsi* (Figure 1). Identification was carried out  
158 with the assistance of Dr. J.E.N Veron (personal communication) and by comparing his photographic  
159 records of Red Sea samples with our photographs taken during coral sampling. Small coral nubbins  
160 (~1cm) were collected in 3-7 m depth from colonies 5 m apart from each other to minimize sampling of  
161 clones and were preserved at room temperature in salt-saturated DMSO buffer (Gaither et al., 2011;  
162 Seutin et al., 1991)

163

### 164 **2.2. DNA extraction, PCR and sequencing**

165

166 Coral nubbins were placed in approximately 400 µL of lysis buffer (DNeasy Plant Minikit; Qiagen,  
167 Hilden, Germany®) with sterile glass beads and beaten for 30 s at full speed in a Qiagen Tissue Lyser II

168 (Qiagen, Hilden, Germany®). After cell lysis, DNA was extracted following the protocol recommended  
169 by the manufacturer. Five mitochondrial genes and four nuclear genes were amplified. First we barcoded  
170 our samples using the *mtORF*, which is considered the most variable gene for Pocilloporidae (Flot and  
171 Tillier, 2007) and a short fragment of the adjacent ATPase subunit 6 gene (*atp6*). After this initial  
172 barcoding step, the mitochondrial control region (CR), the cytochrome *c* oxidase subunit I (*cox1*) and  
173 the mitochondrial 12S and 16S ribosomal RNA (rRNA) genes were amplified for a subset of samples. A  
174 subset was also amplified for several nuclear genes: the heat shock protein (*hsp70*) gene, the internal  
175 transcribed spacers (ITS1 and ITS2) and the Plasma Membrane Calcium ATPase (*PMCA*) gene. The  
176 16S, 12S and *cox1* were amplified with primers designed in this study. The primers we included and  
177 their respective references are listed in the Supplementary Table S2.

178  
179 After amplification, samples were cleaned using the Exostar 1-step protocol (Ilustra®) and sequenced in  
180 both forward and reverse directions; 5-10 specimens of each haplotype were sequenced twice to confirm  
181 the accuracy of the sequences. The forward and reverse chromatograms were assembled and edited  
182 using Chromas-Pro software version 2.1.5.1 (Technelysium, Pty Ltd). Sequences were first aligned  
183 using MUSCLE (Edgar, 2004) as implemented in MEGA version 7.0.26 (Kumar et al., 2016) and when  
184 the resulting alignment contained multiple gaps we used MAFFT's FFT-NS-i (Slow; iterative  
185 refinement method) to improve the alignment (Katoh and Standley, 2013). All alignments were  
186 confirmed and corrected by eye and sequences were trimmed to the same length for further analyses. For  
187 12S and 16S, we removed a small region in which a long stretch of homopolymers did not allow high  
188 confidence in the alignment. Nuclear genes were phased using the programs PHASE Version 2.1  
189 (Stephens and Donnelly, 2003) using the input files obtained in SeqPHASE (Flot, 2010).

190  
191 In the few cases when ITS1, ITS2, or *PMCA* chromatograms showed multiple double peaks (as expected  
192 when sequencing a mixture of DNA sequences of unequal length; Flot et al., 2006) the indels from these  
193 chromatograms were not considered for downstream analyses and only clean regions with double peaks  
194 were included in the phasing process. In addition to our samples from the Red Sea, we amplified and  
195 sequenced the 12S and 16S markers of selected specimens from Flot et al. (2011) from several  
196 geographic regions (New Caledonia, Japan, Philippines and Madagascar). Moreover, previously  
197 published *mtORF* and CR sequences (Flot et al., 2011; Stefani et al., 2011) as well as *hsp70* sequences  
198 (Klueter and Andreakis, 2013) from other geographic regions (i.e. Gulf of Aden and Indo-Pacific) as

199 well as from the Red Sea (i.e. *mtORF* sequences belonging to *S. mamillata*: Arrigoni et al., 2016) were  
200 downloaded from the NCBI database and included in our analyses (accession numbers for these samples  
201 can be found in the respective references). Finally, we also included *cox1* sequences from Keshavmurthy  
202 et al. (2013) that were downloaded from the Dryad Digital Repository: (doi:10.5061/dryad.n2fb2).

203

### 204 **2.3. Identification of zooxanthellae (*Symbiodinium*)**

205

206 *Symbiodinium* types were identified by the amplification of the *ITS2* rDNA in a set of *Stylophora*  
207 samples from the Red Sea collected throughout the same gradient as described above (N=281). We used  
208 the DGGE-ITS2 protocol described in LaJeunesse (2002) with the primers and protocols recommended  
209 in LaJeunesse et al. (2003). DGGE gels, electrophoresis and PCR conditions are fully described in Arif  
210 et al. (2014). Sequences were processed using Chromas-Pro software version 1.7.5 (Technelysium, Pty  
211 Ltd) and phylogenetic assignments were built by comparisons with previously published *ITS2* sequences  
212 in the GeoSymbio data base (Franklin et al. 2012) and the Todd LaJeunesse's database  
213 ([https://131.204.120.103/srsantos/symbiodinium/sd2\\_ged/database/views.php](https://131.204.120.103/srsantos/symbiodinium/sd2_ged/database/views.php)).

214

### 215 **2.4. Sequence variation, phylogenetic and phylogeographic analyses**

216

217 Number of haplotypes (h), polymorphic sites per gene, and shared haplotypes within and among Red  
218 Sea regions (Maqna, Al-Wajh, Yanbu, Kaust, Jeddah, Doga, Farasan, Gulf of Aden; Figure 1) as well as  
219 for other geographic locations (see above), were calculated using Arlequin version 3.5 (Excoffier and  
220 Lischer, 2010) and DNAsp version 5.1 (Librado and Rozas, 2009). Phylogenetic analyses were  
221 performed using *Stylophora* specimens from seven geographic regions (Caledonia, Japan, Philippines,  
222 Madagascar, Gulf of Aden, Arabian Gulf and Red Sea). When several sequences shared the same  
223 haplotype, a single representative was included in the data set for phylogenetic analyses.

224 To account for the phylogenetic signal in indels (insertion-deletion polymorphism) gaps were treated as  
225 missing data and coded as additional presence/absence (0-1) characters with the program Fastgap v1.2.  
226 (Borchsenius 2009) resulting in a data set with two data partitions: nucleotides and standard characters  
227 (0-1). This approach was used to infer Bayesian trees with a mixed model, which allows the  
228 combination of different data partitions with parameters unlinked across partitions (Huelsenbeck and  
229 Ronquist, 2001). The best evolutionary models for each gene and data partition were selected by



230 calculating their BIC (Bayesian Information Criterion) scores as recommended in MEGA v.7 (Kumar et  
231 al. 2016). The non-uniformity of evolutionary rates among sites was modelled using a discrete Gamma  
232 distribution (+G) with 5 rate categories and by assuming a portion of the sites to be invariant (+I). The  
233 gamma shape parameter, proportion of invariant sites, transition/transversion ratio, nucleotide  
234 frequencies and rates of substitutions were also estimated from the data.

235

236 Bayesian trees were built in MrBayes (Huelsenbeck and Ronquist, 2001) at the CIPRES Science  
237 Gateway v 3.1 (Miller et al., 2010). For each data set we performed 4 independent runs (nruns=4) with 1  
238 cold and 3 heated chains (nchains=4). The total number of generations (ngen) was set at 10,000,000;  
239 sampling was performed every 1000 generations (Diagnfreq=1000); and the burn-in fraction was set to  
240 25% (burninfrac=0.25). Convergence was assessed using the program Tracer v 1.7 (Rambaut and  
241 Drummond, 2009). Maximum Likelihood (ML) and Neighbor Joining (NJ trees) were built in MEGA v7  
242 (Kumar et al., 2016), with 1000 bootstrap replicates, We used the nearest neighbor interchange  
243 algorithm (NNI) with an initial tree automatically generated (option: NJ/BioNJ) and the branch-swap  
244 filter set to strong, including all sites in the alignment. NJ trees were constructed using the Maximum  
245 Composite Likelihood method, with the pairwise deletion option activated. Trees were constructed for  
246 all markers, except 16S and *coxI* that showed little or no variability in *Stylophora* spp. (see results).  
247 mt*ORF* and CR phylogenies (using our complete data set) were built only using the alignable regions  
248 among all samples and the outgroups (*Pocillopora* and *Seriatopora*), and alternatively, excluding the  
249 outgroups to allow the analyses of longer fragments (in these cases, the root of the trees was placed in  
250 agreement with that inferred by the phylogeny using shorter fragments and by the loci in which the full  
251 outgroup sequences were included).

252

253 Relationships among haplotypes were explored for the three most variable markers (mt*ORF*, CR and  
254 *hsp70*) using the program HaplowebMaker (<https://eeg-ebe.github.io/HaplowebMaker/>; Spöri and Flot,  
255 in prep.) applying the median-joining algorithm. Haplotypes belonging to specimens from the Pacific  
256 regions and Madagascar were included, when possible, to identify patterns of colonization. The  
257 frequency of each haplotype along the environmental gradient of the Red Sea (i.e. each  
258 locality/population) was calculated using Arlequin v. 3.5 (Excoffier and Lischer, 2010).

## 259 **2.5. Mitogenomes assembly and annotation**

260

261 The complete mitogenomes of the two Red Sea lineages identify in our individual phylogenies analyses  
262 (see results) –called *RS\_LinA* and *RS\_LinB* hereafter– were obtained using two different approaches.  
263 First, paired-end Illumina reads from the draft genome of *Stylophora pistillata* (Voolstra et al. 2017)  
264 –identified as *RS\_LinA*– were downloaded from the NCBI Short Read Archive  
265 (<https://www.ncbi.nlm.nih.gov/sra/SRX999949>) using fastq-dump (fastq-dump --origfmt --split-3  
266 SRR1980974). Second, 1.7 Gb paired-end reads for the *RS\_LinB* were obtained from Red Sea samples  
267 preserved in CHAOS buffer (Flot 2007) and extracted using the DNA NucleoSpin kit (Macherey-  
268 Nagel) following the protocol recommended by the company. Sequencing was performed in an Illumina  
269 NovaSeq 6000 at the BRIGHTcore facilities (Brussels Interuniversity Genomics High Throughput core)  
270

271 The mitogenome of both lineages were assembled de novo from the raw Illumina reads using  
272 NOVOPlasty v2.7.1 (Dierckxsens et al., 2016) with the *cox1* gene as a seed. For the assembly of the  
273 *RS\_LinB* mitogenome, both *cox1* and the complete mitogenome of the *RS\_LinA* were used as seeds.  
274 Runs were performed without and with reference, using the mitogenome of *Stylophora pistillata*  
275 (NC\_011162.1) for comparative purposes. The accuracy of the assembly was confirmed by mapping the  
276 reads back to the assembled genomes using Bowtie2. In addition, the identity of each lineage was  
277 corroborated by aligning the resulting genomes with sequences from six of the markers used for our  
278 interspecific phylogenies (*mtORF*, CR, *atp6*, 12S, 16S and *cox1*). Genes were annotated using MITOS  
279 (Al Arab et al., 2017; Bernt et al., 2013). Alignment for each annotated gene was performed with  
280 MUSCLE (Edgar, 2004) and genes identities were confirmed using BLAST searches. When there was  
281 incongruence, particularly at the 5' and 3' ends of the genes, annotations were manually corrected using  
282 as reference standard (RefSeq) the mitogenome of *Stylophora pistillata* from the NCBI data base  
283 (NC\_011162.1). Finally, genes were concatenated using Fastgap v1.2. (Borchsenius 2009) and aligned  
284 with mitogenomes from other members of the family Pocilloporidae using MAFFT (Katoh and Standley,  
285 2013). The mitogenomes included were: *Seriatopora hystrix* (EF633600.2), *Seriatopora caliendrum*  
286 (EF633601.2), *Pocillopora damicornis* (EF526302.1; EU400213.1), *Pocillopora eydouxi* (EF526303.1),  
287 *Stylophora pistillata* (of Indo-Pacific origin; NC\_011162.1) and *Madracis mirabilis* (EU400212.1).

## 288 **2.6. Analyses of recombination and mitogenome phylogenies**

289

290 Recombination was tested using the alignments of the full mitogenomes from members of the family  
291 Pocilloporidae, including the two divergent *Stylophora* lineages from the present study –see results –;  
292 the genus *Polyciathus* was also included as an external sequence. Seven heuristic recombination  
293 detection methods implemented in the RDP4 package (Martin et al., 2015) were used: RDP (Martin et  
294 al., 2010), BOOTSCAN (Martin et al., 2005), GENECONV (Padidam et al., 1999), MAXCHI  
295 (Maximum Chi Square method; Smith 1992); CHIMAERA (Posada and Crandall, 2001), SISCAN  
296 (Sister Scanning method; Gibbs et al. 2000), and 3SEQ (Boni et al., 2006).

297

298 The default settings were used for most methods, except for window sizes, step sizes and tree building  
299 methods. Window size was selected to include at least 10 variable nucleotide positions within every  
300 window examined. In RPD, SISCAN, and BOOTSCAN methods windows size were set at 100; in  
301 CHIMAERA and MAXCHI at 200. Alternatively, the MAXCHI and CHIMAERA methods were set to  
302 run with variable windows sizes, to allow the program to adjust the window size depending on degrees  
303 of parental sequence divergence as recommended by the author. Only recombination events detected  
304 with  $P < 0.05$ , after Bonferroni correction were recorded.

305

306 The boundaries of the breakpoints were double checked by comparing the agreement of the boundaries  
307 between methods. The major parent and the minor parent hypothesized by the program, were contrasted  
308 against evidence from our phylogenetic and phylogeographic analyses. Furthermore, given that the  
309 parental ascription of the recombinant sequence may be difficult among closely related sequences, we  
310 refined the hypothesis by comparing the hypothesized distribution range of the major *Stylophora* clades  
311 (Keshavmurthy et al., 2013) and the supporting data from previous studies in hybrids species in the  
312 region and outside the Red Sea (DiBattista et al., 2015). It is important to note that the identified major  
313 and minor parents are not the “real” parental sequences, but sequences that are closely related to likely  
314 ancestral sequences, also that the recombinant region is related to the “minor” parent and the “non-  
315 recombinant” region related to the “major” parent (Martin et al., 2015).

316

317 Phylogenetic relationships among mitogenomes were inferred using maximum likelihood trees in  
318 PhylML (Guindon et al., 2010) available at the <http://www.phylogeny.fr/index.cgi> (Dereeper et al.,

319 2010, 2008). Branch support was evaluated using an Approximate Likelihood Ratio test (aLRT)  
320 (Anisimova and Gascuel, 2006). Trees were built for: (a) the full alignments, including and excluding  
321 the recombinant region and (b) genes within the recombinant region. The best model was selected as  
322 indicated in MEGA v7 (Kumar et al., 2016) as the GTR+G+I (General Time Reversible mode, non-  
323 uniformity of evolutionary rates among sites modeled using a discrete Gamma distribution with 5 rate  
324 categories and a fraction invariable sites). Because ambiguously aligned regions or highly divergent  
325 sequences can mislead recombination signals, we ran the analyses including and excluding the *mtORF*  
326 and the *atp8* gene, and also excluding ambiguously aligned regions within the *mtORF*. Finally, to  
327 discard the influence of highly divergent sequences, we repeated the recombination analyses excluding  
328 the mitogenomes of *Madracis* and *Polyciatus* species. After analyses, polymorphic sites in hypervariable  
329 genes within the recombinant region for each *Stylophora* were calculated using DNAsp version 5.1  
330 (Librado and Rozas, 2009).

331

### 332 **3. RESULTS**

333

#### 334 **3.1. Gene variation and polymorphic sites**

335

336 Our largest data set consisted of 827 sequences of the *mtORF* locus, which includes a short region of the  
337 adjacent *atp6* gene, from a large portion of the geographic distribution of *Stylophora* (Figure 1); it  
338 included 716 samples from our collection of the Red Sea, 3 samples from the Arabian Gulf, plus 108  
339 sequences of *S. pistillata* morphospecies from Stefani et al. (2011) and Flot et al. (2011): from the Gulf  
340 of Aden (N=20), Pacific regions (N=60) and Madagascar (N=28). In addition, we produced a second  
341 dataset for four other mitochondrial fragments, from CR (N=401), *cox1* (N=147), 12S (N=72) and 16S  
342 (N=61) and four nuclear fragments, from *hsp70* (N=738), ITS1 (N=75), ITS2 (N=56) and *PMCA*  
343 (N=86) genes. This data set includes sequences from other studies (see material and methods section 2).

344

345 While the *atp6-mtORF* locus (N=827; 884-943 bp) displayed a high level of polymorphism in  
346 *Stylophora* samples, the two *cox1* fragments (303-545 bp) were found monomorphic when comparing  
347 sequences across all Red Sea specimens. Pairwise comparisons among all individuals uncovered  
348 multiple synonymous and non-synonymous substitutions at the 5' end and 3' end of the *mtORF* gene,  
349 but noticeably, the core region was composed mainly by duplicated tandem repeats, which were of

350 variable lengths and dissimilar among *Stylophora* specimens from the Red Sea (in terms of nucleotide  
351 composition and length of the repeat; data not shown). The CR (N=401; 757 bp) was the most variable  
352 of the non-coding markers, with polymorphism mainly caused by variation in the number of tandem  
353 repeats, some of them being specific to *Stylophora* specimens inhabiting different geographic areas.  
354 Polymorphic sites, indels and parsimony informative sites for mitochondrial and nuclear genes are  
355 recorded in Supplementary Table S3.

356

### 357 **3.2. Phylogenetic analyses**

358

359 ML and Bayesian phylogenies inferred from the *atp6*-*mtORF* locus including *Pocillopora* as an  
360 outgroup (no shown) or excluding the outgroup (Figure 2a) showed a large phylogenetic subdivision  
361 between two groups, each associated with both high Bayesian Posterior Probabilities (BPP > 1.0) and  
362 high bootstrap values (> 99%). A first clade, (N=461; h=27) included some of the sequences from the  
363 Red Sea and the Gulf of Aden and those from the Arabian Gulf (N=373; h=12), plus sequences from  
364 Madagascar (N=28, h=6) and the Pacific (N=60; h=9); the second clade included the other specimens  
365 from the Red Sea and Gulf of Aden (N=366; h=14) –we refer to this clade as the Red Sea Lineage B  
366 (*RS\_LinB*)– (Figure 2a). These two lineages were also evident in the mitogenome phylogenies of the  
367 family using the full *atp6* (678 bp) and *nd6* genes (564 bp) (Figure 3a) and in the phylogenies derived  
368 from our recombination analyses (Figure 3b) –See recombination results below–. In fact, the *atp6* gene  
369 revealed 50 and 45 polymorphic sites between *RS\_LinB* vs *RS\_LinA* and *RS\_LinB* vs Indo-Pacific/Indian  
370 Ocean lineage respectively, and only 8 polymorphic sites between *RS\_LinA* and the Indo-Pacific/Indian  
371 Ocean lineage.

372

373 In contrast, in the phylogenetic trees inferred from all other markers, whether mitochondrial (CR, 12S)  
374 or nuclear (ITS1; ITS2, *hsp70*; *PMCA*) (Figures 2b and Supplementary Figure S1), *RS\_LinA* and  
375 *RS\_LinB* sequences form a clade that exclude all sequences from Madagascar and from the Indo-Pacific  
376 region. There is therefore a major incongruence between the phylogenetic signal of *atp6*, *nd6* and the  
377 *mtORF* vs the CR and 12S (Figure 2 and Figure 3a) and between mtDNA genes vs the nuclear genes.  
378 The ITS2 showed a pattern similar to that of the CR, in which *RS\_LinA* and *RS\_LinB* are almost  
379 completely separated; there is only one individual from *RS\_LinB* placed inside the clade formed by

380 *RS\_LinA* sequences, and vice versa, on the ITS2 tree (Supplementary Figure S1). The *cox1* and the 16S  
381 trees provided only little phylogenetic information (not shown).

382

### 383 **3.3. Comparative analyses between *RS\_LinA* and *RS\_LinB***

384

#### 385 **3.3.1. Intraspecific phylogenies and morphospecies-clade association**

386

387 Bayesian and ML trees obtained based on the full-length sequences of the *atp6*-*mtORF* locus, thus  
388 analyzing members of each lineage (*RS\_LinA*, 884 bp, h=33; *RS\_LinB*, 943 bp, h=20) separately, are  
389 shown in Figure 4. In general, we found no clear association between Red Sea morphospecies and  
390 phylogenetic groups in the *RS\_LinA* lineage. For example, some mitochondrial haplotypes were shared  
391 among different morphotypes or/and individuals exhibiting the same morphotypes were placed into  
392 different subclades (Figure 4a); the only exceptions were haplotypes belonging to morphotypes of *S.*  
393 *kuelhmanni*, that were all associated with subclade *LA1*, and those from *S. mamillata* –from Arrigoni et  
394 al. (2016)– that were exclusively found in subclade *LA3* (data not shown). Instead, in the *RS\_LinB*  
395 lineage, morphotypes attributed to *S. subseriata* (called *Stylophora* cf. *subseriata* thereafter) were  
396 grouped in subclade *LB1* and displayed haplotypes found exclusively in the northern Red Sea –see  
397 phylogeographic analyses below– and were differentiated from morphotypes belonging to *S. pistillata*  
398 (mainly short and medium branched morphotypes, called as *Stylophora* cf. *pistillata* from now on),  
399 whose haplotypes were distributed mainly in the central-southern Red Sea and were placed in subclade  
400 *LB2* (Figure 4b).

401

#### 402 **3.3.2. *Symbiodinium* distribution**

403

404 As for zooxanthellae, *Symbiodinium* type A1 (*Symbiodinium microadriaticum*) was the most abundant  
405 in members of *Stylophora* within the Red Sea (167 out of 281 colonies), followed by *Symbiodinium* type  
406 C160 (N=49). The distribution of these types was somehow different between members of each  
407 *Stylophora* mtDNA lineage (Figure 4). In colonies placed within the *RS\_LinB* and inhabiting the  
408 northern Red Sea (i.e. subclade *LB1*; *Stylophora* cf. *subseriata*; N=76) the most abundant type was C160  
409 (N=41) followed by type A1 (N=22) and few colonies presented both types (A1-C160; N=9). In  
410 contrast, colonies distributed in the central-southern areas (i.e. subclade *LB2*; i.e. *Stylophora* cf.

411 *pistillata*) were mainly associated with type A1 (40 out of 54 colonies) and the presence of C160 type,  
412 or of this type in combination with A1 (A1-C160) were not detected. In southern regions, few colonies  
413 exhibited the C1\* type, which was not present in northern colonies and was always found in association  
414 of type A1 (i.e. A1-C1\*; N=10). Other C types or associations A1-C types were found in very low  
415 abundance (i.e. in one colony). A high percentage of the colonies of the *Stylophora RS\_LinA* (105  
416 colonies out of 151) showed association with *Symbiodinium microadriaticum* in both northern and  
417 southern regions. The few colonies carrying C160 or A1-C160 types were mainly found in Yanbu (7 out  
418 of 11 colonies). The presence of C1\* and A1-C1\* types were detected mostly in colonies inhabiting the  
419 southernmost area of the Red Sea (i.e. Farasan; 7 out of 8 colonies). Few C types (i.e. C161, C162,  
420 C116) and combination of A1 with other types (i.e. A1-D, A1-C41, A1-B, A1-C1, A1-C19; A1-sp)  
421 displayed low frequencies and some of them were exclusive of colonies belonging to this group (Figure  
422 4).

423

#### 424 **3.4. Comparative phylogeography of *RS\_LinA* and *RS\_LinB* and patterns of genetic variation** 425 **along the Red Sea gradient**

426

427 Median-joining networks were constructed for the markers for which we had the largest number of  
428 sequences: *atp6-mtORF* (N=827), CR (N=401) and *hsp70* (N=738). Each network indicates a clear  
429 phylogeographic signal (i.e., there was a visible association between genetic variation and geographic  
430 location). The north-south genetic differentiation was more pronounced for *RS\_LinB* than for *RS\_LinA*,  
431 a pattern supported by all three loci (Figure 5). Haplotype frequencies along the gradient were somehow  
432 different among lineages. In *RS\_LinB* the highest frequencies of the most common haplotypes were  
433 found either in northern or southern areas, while haplotype frequencies in *RS\_LinA* showed a clinal  
434 variation (Supplementary Figure S2). For the *hsp70*, haplotypes showed different frequencies along the  
435 gradient when evaluated per mtDNA lineage (Supplementary Figure S2c) and the pattern was similar to  
436 that shown by the *atp6-mtORF* locus.

437

#### 438 **3.5. mtDNA recombination analyses**

439

440 The analyses of the mitogenomes for all members of the family Pocilloporidae including *RS\_LinA* and  
441 *RS\_LinB* and the genus *Polycyathus*, resulted in the detection of several recombination events in

442 pocilloporid corals. Recombination signals were detected in *Stylophora*, *Seriatopora* and *Madracis*. The  
443 signals for *Stylophora* and *Seriatopora* were confirmed when excluding the two divergent genomes of  
444 *Madracis* and *Polycyathus*. In *Stylophora* the strongest signal supported by all seven methods was found  
445 in *RS\_LinA*, with the major parent hypothesized as the *RS\_LinB* and the minor parent *Stylophora*  
446 *pistillata* (Taiwan). *P*-values were as follow: RDP =  $1.175 \times 10^{-10}$ ; GENECONV =  $8.96 \times 10^{-11}$ ;  
447 BOOTSCAN =  $1.237 \times 10^{-11}$ ; MAXCHI =  $7 \times 10^{-16}$ ; CHIMAERA =  $4.019 \times 10^{-03}$ ; SISCAN =  $1.090 \times$   
448  $10^{18}$  and 3SEQ =  $2.969 \times 10^{-29}$ . The boundaries of the breakpoints were placed at the end of the *nd2*  
449 genes by all methods, extending across the *nd6*, *atp6*, *mtORF* and ending at the beginning of the *nd4*  
450 gene (Supplementary Figure S3). A second event, in which the recombinant region was transferred from  
451 *Pocillopora* to the *RS\_LinB* was hypothesized, in this case the recombinant region was restricted to the  
452 *atp6* gene. A third event was detected, by only 3 methods, in *Seriatopora hystrix* and *Seriatopora*  
453 *caliendrum*.

454

455 Family phylogenies focused in *Stylophora* and including the region inherited from the minor parent (*S.*  
456 *pistillata*, Taiwan; 2415 bp) and the major parent (*RS\_LinB*; 9555 bp) (Figure 3b) corroborated the  
457 phylogenetic patterns outlined for *RS\_LinA* and *RS\_LinB* in our interspecific phylogenies (Figure 2).

458

#### 459 **4. DISCUSSION**

460

461 The results from our study show support for the hypothesis that mtDNA introgressive hybridization is  
462 the most likely cause of topological mito-mito incongruence in *Stylophora*. Our recombination analyses,  
463 using the full mitogenomes of pocilloporid corals (*Madracis*, *Pocillopora*, *Seriatopora* and *Stylophora*,  
464 including the two Red Sea lineages), provides evidence of mtDNA introgression in this group –  
465 particularly in *Stylophora*– strongly suggesting the existence of a hybrid lineage (*RS\_LinA*) in the Red  
466 Sea, Gulf of Aden and Arabian Gulf. The mitogenome of this lineage contains introgressed genes from  
467 two divergent mitochondrial lineages: on mtDNA genes found in the recombinant region (i.e. covering  
468 the complete *nd6*, *atp6* and *mtORF* genes), which have been inherited from a parental species included  
469 in a lineage distributed in the Indo-Pacific/Indian Ocean region, while all other mtDNA genes can be  
470 traced back to the ancestor of the *RS\_LinB*. In the Red Sea, the *RS\_LinA* is found in sympatric  
471 association with the descendants of its local parental species (*RS\_LinB*), and they harbour different  
472 phylogeographic patterns and different *Symbiodinium* composition. In addition, we found that



473 morphospecies placed within the *RS\_LinB* agreed with phylogenetic subclades, which accounts for the  
474 presence of two divergent allopatric populations divided in northern and southern areas, consistent with  
475 environmental and oceanographic discontinuities, a trend that was completely absent in the hybrid  
476 *RS\_LinA*.

477  
478 The colonization of the extreme environments of Red Sea by the ancestral *RS\_LinB* implied the  
479 development of adaptations to demanding temperature and salinity conditions. This likely involved  
480 selective pressures observed to multiple amino acid changes in mitochondrial proteins, evidenced by the  
481 highest substitution rate in the *atp6* and in the *mtORF* genes of the *RS\_LinB*, when compared with other  
482 *Stylophora* lineages, which suggest a role of such mtDNA genes in the adaptation to extreme  
483 environments. These results have important implications for the conservation of Red Sea species and  
484 corals.

485

#### 486 **4.1. Divergent mitochondrial lineages of *Stylophora* are present in the Red Sea**

487

488 Our *atp6*-*mtORF* phylogenetic analyses highlight the presence of two divergent sympatric *Stylophora*  
489 lineages in the Red Sea/Gulf of Aden/Arabian Gulf areas: the *RS\_LinA* sharing a common ancestry with  
490 an Indo-Pacific/Indian Ocean/Madagascar lineage –placed in Clade 1– and the *RS\_LinB* lineage, which  
491 form a unique clade on its own –Clade 2– (Figure 2). These lineages were also supported by the family  
492 phylogenies of the *atp6* and *nd6* genes (Figure 3a). Noticeably, these phylogenies showed topological  
493 incongruence with those of the CR/12S loci (Figures 2b, 2c). Furthermore, the four nuclear genes used  
494 in these analyses did not support the existence of *RS\_LinA* and *RS\_LinB* lineages (Supplementary Figure  
495 *S1*). The only nuclear gene that showed a similar phylogenetic pattern of that shown by the CR and 12S  
496 genes, was the ITS2, which likely imply that the ITS2, subject to concerted evolution, tells a similar  
497 evolutionary history to that of mitochondrial genes.

498

499 Mito-nuclear incongruence such as reported in this study have already been reported in the literature on  
500 many metazoans taxa (Forsman et al., 2017; Pavlova et al., 2013; Salvi et al., 2017; Toews and  
501 Brelsford, 2012; Willis et al., 2006) and they are frequently invoked as one of the main signatures of  
502 selection (Morales et al., 2015), the result of incomplete lineage sorting (DeBiasse et al., 2014; Richards  
503 and Hobbs, 2015; Van Oppen et al., 2001) or introgressive hybridization (Forsman et al., 2017b;

504 Gompert et al., 2008). The latter is often considered to be rampant in corals, with reticulate evolution  
505 having been proposed as one of the main processes that contributed, in great extent, to their successful  
506 adaptation after the geographical range expansions induced by several catastrophic events, such as the  
507 Cretaceous mass extinctions and the glacial events of the Plio-Pleistocene (Veron, 1995). Our finding of  
508 incongruity in the phylogenetic patterns among mitochondrial genes versus nuclear genes in *Stylophora*,  
509 are therefore consistent with multiples studies in reef building corals.

510

511 In addition, to our knowledge, the degree of incongruence in mtDNA genes found in our analyses has  
512 not being identified in others coral genera so far. In *Stylophora*, incongruence between the mt*ORF* and  
513 the *CR* topologies was reported by Arrigoni et al. (2016) and Stefani et al. (2011). These authors  
514 suggested that the most plausible hypothesis for explaining this finding was the presence of pseudogenes  
515 at the mitogenome of this group, but we found no evidence for stop codons or other signs of ORF  
516 disruption, rather evidence that this mt*ORF* may code for a functional transmembrane protein  
517 (Banguera-Hinestroza et al. unpublished results) as proposed by Flot and Tillier (2007). Therefore, we  
518 believe that other hypotheses such as recombination resulting from introgressive hybridization at the  
519 mtDNA genome of *Stylophora* are equally probable as the ones discussed in Stefani et al. (2011).

520

521 In species with a uniparental inheritance of mtDNA, genes are linked and are expected to show the same  
522 phylogenetic patterns (Ladoukakis and Zouros, 2017). However, contrasting topologies in mtDNA genes  
523 may arise as the result of mtDNA introgressive hybridization, which is known to have a clear impact in  
524 genealogical and phylogenetic reconstructions (White et al., 2008). The presence of divergent  
525 mitochondrial genomes in the germline of an organism (heteroplasmy) as the result of paternal leakage  
526 (Barr et al., 2005; Kuijper et al., 2015; Passamonti et al., 2013; Rokas et al., 2003) may result in mtDNA  
527 recombination (considering that heteroplasmy have remained without modifications in the oocyte  
528 cytoplasm long enough for allowing recombination between paternal and maternal mtDNA; White et al.,  
529 2008). In the case that the recombinant genome become fixed, viable, and passed to the following  
530 generations it would result in viable hybrids carrying a mixed mtDNA genome (Rokas et al., 2003;  
531 White et al., 2008; Wilton et al., 2018). Even though, heteroplasmy have not been recorded in reef-  
532 building corals, there is an increasing evidence that mtDNA recombination resulting from mtDNA  
533 introgressive hybridization is not rare in nature (Barr et al., 2005; Levsen et al., 2016; Piganeau et al.,  
534 2004; Rokas et al., 2003).

## 535 **4.2. mtDNA recombination explains topological incongruence**

536

537 Our recombination analyses hypothesized the *RS\_LinA* as a recombinant sequence with high  
538 probabilities in all methods ( $P$ -values ranging between  $4.0 \times 10^{-03}$  and  $2.96 \times 10^{-29}$ ) with the major  
539 parent being the sequence from *RS\_LinB*, and only the minor parent the sequences from *S. pistillata*  
540 from Taiwan. For *RS\_LinA* the recombinant region –inherited from the minor parent –spans the full *nd6*,  
541 *atp6* and *mtORF* (Supplementary Figure S3), which explain that trees constructed with these genes  
542 showed a common ancestry between the *RS\_LinA* and the Indo-Pacific/Indian ocean/Madagascar  
543 lineages, while the same trees show a strong diversification between these two lineages and the *RS\_LinB*  
544 (Figure 2 and Figure 3). Moreover, the *RS\_LinA*, inherited most of its mtDNA genes from the ancestor  
545 of *RS\_LinB*. Therefore, it is expected that other mtDNA genes display a closest relationship between the  
546 *RS\_LinA* and the *RS\_LinB*, as shown in our phylogenies for the CR and 12S genes and in the  
547 mitogenome phylogenies excluding the recombinant region (Figure3b). Consequently, our data strongly  
548 supports mtDNA introgressive hybridization followed by recombination as the main cause of mito-mito  
549 topological incongruence in *Stylophora*.

550

551 We interpret these results as a strong evidence that *RS\_LinA* likely arose from a hybridization event  
552 between two ancestral *Stylophora* lineages. The introgression pattern follow that recorded in species of  
553 hybrid zones, in which hybrids usually display an unequal mix of two mtDNA genetic backgrounds,  
554 with most mitochondrial genes or genetic polymorphism passed from the genetic pool of the local  
555 species to the genome of the “invader” species (asymmetric patterns of introgression; Harrison and  
556 Larson, 2014).

557

## 558 **4.3. Interspecific phylogenies and comparative phylogeographic analyses**

559

560 As our study focuses at the population level –based on the three most variable genes used here: the  
561 *hsp70*, the CR and the *mtORF* – markedly different phylogeographic patterns arises for *RS\_LinA* and for  
562 *RS\_LinB* along the latitudinal and environmental gradient in the Red Sea (Figure 5). These patterns  
563 show a strong structure for *RS\_LinB*, in which the groups supported by the phylogenetic analyses  
564 (Figure 4) have restricted distribution either in the northern Red Sea or in the southern Red Sea, with the  
565 break between the two zones found around Yanbu, a trend that was supported by the distribution of the

566 haplotype frequencies along the gradient for each gene (Supplementary Figure S2). In contrast, a lack of  
567 association with northern and southern environmental provinces was found in members of *RS\_LinA*, and  
568 rather a clinal variation in haplotype frequencies was found across the gradient (Supplementary Figure  
569 S2).

570

571 Both lineages were also remarkably different in terms of morphology and *Symbiodinium* association: in  
572 the northern Red Sea population of *RS\_LinB* (i.e. subclade *LBI*; Figure 4b) most colonies were  
573 associated with morphotypes of *Stylophora subseriata* (as described in Veron et al. 2018) and  
574 *Symbiodinium* type C160; whereas the central-southern population (i.e. subclade *LB2*; Figure 4b)  
575 grouped mostly individuals described in the literature as *Stylophora pistillata* and were associated  
576 mainly with *Symbiodinium* type A1, but in contrast to the northern group, no colonies were found  
577 carrying C160 or A1-C160 *Symbiodinium* types. Contrary to the trends detected in *RS\_LinB*, colonies  
578 belonging to the hybrid lineage (*RS\_LinA*) showed high phenotypic plasticity and most colonies carried  
579 a *Symbiodinium* type A1 in both northern and southern regions (Figure 4).

580

581 The strong differences found in both lineages, in terms of phylogeography, population subdivision, and  
582 congruence/incongruence between morphology and phylogenies, reinforces the hypothesis of an early  
583 colonization of the Red Sea by members of *RS\_LinB* and a recent colonization of *RS\_LinA* in agreement  
584 with its hybrid origin. This evolutionary scenario could be explained on the light of the multiple  
585 processes that have affected the region during the last glacial periods, as well as of the demographic  
586 history of reef coral fauna in this region. Several studies targeting the geological dynamic of the Red Sea  
587 and the patterns of diversity and endemism of its fauna (DiBattista et al., 2016a, 2016b; Fine et al.,  
588 2013; Moustafa et al., 2014; Moustafa and Hallock, 2008; Rohling et al., 2008) indicate that early coral  
589 reefs inhabiting this region (i.e. likely present in the region since the Miocene; Taviani 1998) were able  
590 to survive extreme climatic variations in sea levels and periods of hyper salinity (Rohling et al., 2013;  
591 Siddall et al., 2003; Righton et al., 1996; Rohling et al., 2013) thanks to the presence of refuge areas in  
592 the northern Red Sea (i.e. the Gulf of Aqaba) and in the southern regions (i.e. Southern Red Sea and  
593 Gulf of Aden) (Fine et al., 2013; Moustafa et al., 2014; Pellissier et al., 2014). Therefore, isolation in  
594 these refuge zones leading to diversification and posterior recolonization may explain the differentiation  
595 in allopatry of northern and central-southern populations of *RS\_LinB*.

596 Furthermore, the phylogeographic patterns, such as the one presented here are also in accordance with  
597 several biogeographic studies, showing that oceanographic conditions along the environmental gradient  
598 of the Red Sea (Raitsos et al., 2013; Sawall et al., 2015) have originated barriers to genetic flow,  
599 influenced strongly the population structure of several species, and shaped patterns of endemism in this  
600 region (DiBattista et al., 2016a; Nanninga et al., 2014; Saenz-Agudelo et al., 2015), despite the fact that  
601 they seem to have little impact on reef communities in terms of richness of species and species diversity  
602 (Roberts et al., 2016). For example, Nanninga et al. (2013) found a good correlation between the genetic  
603 differentiation among anemonefish (*Amphiprion bicinctus*) along the Saudi Arabian coast and the  
604 environmental heterogeneity in this basin, with the steadiest genetic break found at approximately 19°N  
605 (Southern Red Sea), which coincided with a sharp increase in turbidity in this zone. Results of our study  
606 also concur with those of Froukh and Kochzius (2008, 2007) who also found high genetic differentiation  
607 that were related to physical differences among fourline wrasse fish (*Larabicus quadrilineatus*) from the  
608 northern and southern Red Sea. On a larger scale, research on butterfly and angel fish by Roberts et al.  
609 (1992) and studies by DiBattista et al. (2013) have hypothesized that several reef fish species diversified  
610 and remained restricted to the Red Sea.

#### 611 612 **4.4. The diversification of *Stylophora* in the Red Sea and Gulf of Aden**

613  
614 Our phylogeographic analyses indicate a broad distribution of *RS\_LinB* across the Red Sea but limited  
615 distribution in the Gulf of Aden (only few 5 out of 37 samples carrying a single mtDNA haplotypes  
616 were found in this region, see also Stephani et al. 2017) (Supplementary Figure S2), which suggest that  
617 the ancestor of *RS\_LinB* was likely endemic of these regions, with the border of its distribution in the  
618 Gulf of Aden. This lineage likely interbred with a lineage of broader distribution in the Indo-  
619 Pacific/Indian-Ocean at the periphery of its range, which is also a confluence between several marine  
620 provinces: the Red Sea and Gulf of Aden, the western Indian Ocean, and Indo-Polynesian provinces, at  
621 zone that have been shown to hold several hybrid species (DiBattista et al., 2015). Moreover, the  
622 phylogenetic position of Arabian Gulf haplotypes, which were placed in the same subclades of the  
623 *RS\_linA* specimens, implies that the hybrid expanded its range into the Arabian Gulf and into the Red  
624 Sea –where it lives in sympatry with the descendants of the parental lineage–

625  
626 Our results concur with multiple studies that have identified a large number of hybrid species in the Red

627 Sea (Berumen et al., 2017; DiBattista et al., 2016a) and seem to fit in the model of hybrid zones and  
628 marginal areas (Barton, 1979; Hewitt, 1988), in which species from a diverse range of taxonomic groups  
629 (i.e. plants, yeasts and to a lesser extent animals) living at the edge of their geographic ranges produce  
630 viable hybrids carrying recombinant mitogenomes (Barr et al., 2005; Rokas et al., 2003). These hybrids  
631 are able to adapt to new climatic conditions, and diverge in sympatric association with their parental  
632 species (Ballard and Whitlock, 2004; Barr et al., 2005; Fourie et al., 2018; Galtier, 2011; Leducq et al.,  
633 2017; Mastrantonio et al., 2016; Peris et al., 2017; Rokas et al., 2003; Ujvari et al., 2007). Moreover, the  
634 pattern found in our results in *Stylophora* were similar to those found in hybrid species of marine reef-  
635 fishes, found at the intersection of three main biogeographical regions: the Red Sea and Gulf of Aden,  
636 the western Indian Ocean and the Indo-Polynesian provinces (DiBattista et al., 2015). These authors  
637 identify 14 hybrid species based in molecular markers and morphological characteristics, the gene flow  
638 was unidirectional, and the parental species were found at the periphery of their distribution range,  
639 where they showed the lowest abundance. Interestingly, as in our work with *Stylophora*, the reported  
640 hybrids were found to be the result of intercrosses between endemic species, with restricted distribution  
641 range in the Red Sea and Arabian Gulf, with species broadly distributed in the Indo-Pacific, and the  
642 major parental species was at the limit of its distribution and almost absent from the Gulf of Aden area.

#### 643 644 **4.5. Implications for conservation in a climate change scenario**

645  
646 Under the current challenges that climatic change poses for coral reef ecosystems, particularly with the  
647 rising of oceanic temperatures above the limit threshold of most species (1°C above mean summer  
648 maximum) (Hughes et al., 2018; Pandolfi et al., 2011) evolutionary studies with a clear assessment of the  
649 demographic history of species and populations are of great relevance, particularly to understand the main  
650 mechanisms involved in adaptation and speciation in variable and extreme environments. Our study,  
651 coupling recombination analyses, phylogenetic and phylogeographic patterns, suggest that mtDNA genes  
652 may play a key role in adaptation to extreme environments in coral species.

653  
654 Two genes, the *atp6* gene and the *mtORF* gene showed high mutation rates and extreme variability in  
655 the *RS\_LinB* leading to amino acid and structural changes in their encoded proteins, particularly in the  
656 *mtORF* (Banguera-Hinestroza et al. unpublished data). Interestingly, the *atp6* gene is part of a group of  
657 genes that are essential in releasing and controlling the proliferation of deleterious oxygen radicals

658 (ROS) in the mitochondria (Kühlbrandt., 2015; Wirth et al., 2016), which are known for causing  
659 oxidative damage to symbionts and corals during exposition to high temperatures, with the subsequent  
660 bleaching and dead of corals (Downs et al., 2002; Smith et al., 2005).

661  
662 In *RS\_LinB*, the frequencies of the most common haplotypes of the *mtORF* locus were associated with  
663 coldest (north) or hottest (central-south) areas in the Red Sea (Supplementary Figure S2), a tendency  
664 that was also followed by the haplotype frequencies of the *hsp70* gene –a chaperone protein involved in  
665 heat stress response (Kvitt et al., 2016; Mayer and Bukau, 2005)–, suggesting that both proteins may  
666 have played a similar role in the adaptation to temperature in *RS\_LinB* variants. This premise was  
667 supported by the computational characterization of the *mtORF* protein (Banguera-Hinestroza et al.  
668 unpublished) in which searches against approx. 95 million protein domains classified in the CATH data  
669 base –using the pDomTHREADER approach (Lobley et al., 2009)–, revealed that domains in the  
670 *mtORF* protein of *RS\_LinB*, have the highest matches with annotated domains involved in the structural  
671 integrity of a complex or its assembly within or outside a cell (CATH domain code: 1s58A00) and  
672 domains that play a role in cell-to-cell, cell-to-matrix interactions, and response to stress (1ux6A01) with  
673 high levels of confidence ( $0.001 < P < 0.01$ ).

674  
675 These findings may suggest that selective pressures imposed by the extreme environmental variations in  
676 the Red Sea along multiple geological periods, may had have an impact in the mitogenome of this  
677 lineage, with consequences in adaptation and speciation, as have been found in other taxa evolving in a  
678 broad range of environmental conditions (Hill, 2017, 2016; Lamb et al., 2018). Even though the  
679 *RS\_LinB* hybridized with an Indo-Pacific/Indian Ocean lineage, the resulting hybrid (*RS\_LinA*) did not  
680 inherited the variation at the *nd6*, *atp6* and *mtORF* genes, this open the question whether other  
681 mitochondrial genes or mtDNA mechanisms may play a role in hybrid speciation and adaptation, or  
682 whether the hybrid may be more vulnerable to strong temperature variation (i.e. nowadays the *RS\_LinA*  
683 is very rare in the Arabian Gulf Area; Banguera-Hinestroza et al. unpublished results).

684  
685 Taken together, our data indicate that hybridization in corals could be more complex than commonly  
686 expected, involving mechanisms such as mitochondrial metabolism and mitochondrial genome  
687 evolution as have been previously emphasized by Dixon et al., (2015) that demonstrated a strong  
688 maternal effect in heat stress tolerance. Assisted hybridization has been proposed as an alternative for

689 conservation of coral reef via genetic rescue (Chan et al., 2018); however, little is known about the  
690 molecular mechanisms enhancing hybrid adaptation and speciation under extreme climatic conditions. A  
691 clear understanding of these mechanisms coupled with the demographic history of coral populations is  
692 therefore needed to pursue effective conservation plans.

693

#### 694 **Funding statement**

695

696 This research was funded by King Abdullah University of Science and Technology (KAUST), Saudi  
697 Arabia (sample analysis) and by King Abdulaziz University (KAU) as part of the Jeddah Transect  
698 project (sample collection) and by a postdoctoral research fellowship from the Université libre de  
699 Bruxelles, Belgium.

700

701 **Acknowledgments:** The authors want to thank Dr. Veron for assistance with voucher identification, Dr.  
702 Saenz Agudelo for sample collections and recommendations, Dr. Bouwmeester for sample collection,  
703 Vanessa Robitzsch for helping with the DNA extractions, Catalina Ramirez for her support in  
704 bioinformatics pipelines and Sebastien Santini - CNRS/AMU IGS UMR7256, for its effort in  
705 maintaining the excellence of the Phylogeny.fr site. We thanks to King Abdulaziz University (KAU) and  
706 the Bioscience Core Lab at KAUST for sharing their facilities.

707

#### 708 **5. REFERENCES**

- 709 Acker, J., Leptoukh, G., Shen, S., Zhu, T., Kempler, S., 2008. Remotely-sensed chlorophylla  
710 observations of the northern Red Sea indicate seasonal variability and influence of coastal reefs. *J.*  
711 *Mar. Syst.* 69, 191–204. <https://doi.org/10.1016/j.jmarsys.2005.12.006>
- 712 Al Arab, M., Höner zu Siederdisen, C., Tout, K., Sahyoun, A.H., Stadler, P.F., Bernt, M., 2017.  
713 Accurate annotation of protein-coding genes in mitochondrial genomes. *Mol. Phylogenet. Evol.*  
714 106, 209–216. <https://doi.org/10.1016/j.ympev.2016.09.024>
- 715 Anisimova, M., Gascuel, O., 2006. Approximate Likelihood-Ratio test for branches: A fast, accurate,  
716 and powerful alternative. *Syst. Biol.* 55, 539–552. <https://doi.org/10.1080/10635150600755453>
- 717 Arrigoni, R., Benzoni, F., Terraneo, T.I., Caragnano, A., Berumen, M.L., 2016. Recent origin and semi-  
718 permeable species boundaries in the scleractinian coral genus *Stylophora* from the Red Sea. *Sci.*  
719 *Rep.* 6, 34612. <https://doi.org/10.1038/srep34612>



- 720 Ballard, J.W.O., Rand, D.M., 2005. The population biology of mitochondrial DNA and its phylogenetic  
721 implications. *Annu. Rev. Ecol. Evol. Syst.* 36, 621–642.  
722 <https://doi.org/10.1146/annurev.ecolsys.36.091704.175513>
- 723 Ballard, J.W.O., Whitlock, M.C., 2004. The incomplete natural history of mitochondria. *Mol. Ecol.* 13,  
724 729–744. <https://doi.org/10.1046/j.1365-294X.2003.02063.x>
- 725 Barr, C.M., Neiman, M., Taylor, D.R., 2005. Inheritance and recombination of mitochondrial genomes  
726 in plants, fungi and animals. *New Phytol.* 168, 39–50. <https://doi.org/10.1111/j.1469-8137.2005.01492.x>
- 727
- 728 Barton, N.H., 1979. The dynamics of hybrid zones. *Heredity (Edinb.)* 43, 341–359.  
729 <https://doi.org/10.1038/hdy.1979.87>
- 730 Bernt, M., Donath, A., Jühling, F., Externbrink, F., Florentz, C., Fritzschn, G., Pütz, J., Middendorf, M.,  
731 Stadler, P.F., 2013. MITOS: Improved de novo metazoan mitochondrial genome annotation. *Mol.*  
732 *Phylogenet. Evol.* 69, 313–319. <https://doi.org/10.1016/j.ympev.2012.08.023>
- 733 Berumen, M.L., DiBattista, J.D., Rocha, L.A., 2017. Introduction to virtual issue on Red Sea and  
734 Western Indian Ocean biogeography. *J. Biogeogr.* 44, 1923–1926.  
735 <https://doi.org/10.1111/jbi.13036>
- 736 Boni, M.F., Posada, D., Feldman, M.W., 2006. An exact nonparametric method for inferring mosaic  
737 structure in sequence triplets. *Genetics* 176, 1035–1047.  
738 <https://doi.org/10.1534/genetics.106.068874>
- 739 Brennan, A.C., Woodward, G., Seehausen, O., Muñoz-Fuentes, V., Moritz, C., Guelmami, A., Abbott,  
740 R.J., Edelaar, P., 2014. Hybridization due to changing species distributions: Adding problems or  
741 solutions to conservation of biodiversity during global change? *Evol. Ecol. Res.* 16, 475–491.
- 742 Chan, W.Y., Peplow, L.M., Menéndez, P., Hoffmann, A.A., van Oppen, M.J.H., 2018. Interspecific  
743 hybridization may provide novel opportunities for coral reef restoration. *Front. Mar. Sci.* 5, 1–15.  
744 <https://doi.org/10.3389/fmars.2018.00160>
- 745 Chen, C., Chiou, C.-Y., Dai, C.-F., Chen, C.A., 2008. Unique mitogenomic features in the scleractinian  
746 family pocilloporidae (Scleractinia: Astrocoeniina). *Mar. Biotechnol.* 10, 538–553.  
747 <https://doi.org/10.1007/s10126-008-9093-x>
- 748 Chinnery, P.F., Hudson, G., 2013. Mitochondrial genetics. *Br. Med. Bull.* 106, 135–159.  
749 <https://doi.org/10.1093/bmb/ldt017>
- 750 Combosch, D.J., Vollmer, S. V., 2015. Trans-Pacific RAD-Seq population genomics confirms

- 751        introgressive hybridization in Eastern Pacific *Pocillopora* corals. *Mol. Phylogenet. Evol.* 88, 154–  
752        162. <https://doi.org/10.1016/j.ympev.2015.03.022>
- 753    DeBiasse, M.B., Nelson, B.J., Hellberg, M.E., 2014. Evaluating summary statistics used to test for  
754        incomplete lineage sorting: mito-nuclear discordance in the reef sponge *Callyspongia vaginalis*.  
755        *Mol. Ecol.* 23, 225–238. <https://doi.org/10.1111/mec.12584>
- 756    Dereeper, A., Audic, S., Claverie, J.M.M., Blanc, G., 2010. BLAST-EXPLORER helps you building  
757        datasets for phylogenetic analysis. *BMC Evol. Biol.* 10, 8. <https://doi.org/10.1186/1471-2148-10-8>
- 758    Dereeper, A., Guignon, V., Blanc, G., Audic, S., Buffet, S., Chevenet, F., Dufayard, J.F., Guindon, S.,  
759        Lefort, V., Lescot, M., Claverie, J.M., Gascuel, O., 2008. Phylogeny.fr: robust phylogenetic  
760        analysis for the non-specialist. *Nucleic Acids Res.* 36, W465–W469.  
761        <https://doi.org/10.1093/nar/gkn180>
- 762    DiBattista, J.D., Berumen, M.L., Gaither, M.R., Rocha, L.A., Eble, J.A., Choat, J.H., Craig, M.T.,  
763        Skillings, D.J., Bowen, B.W., 2013. After continents divide: comparative phylogeography of reef  
764        fishes from the Red Sea and Indian Ocean. *J. Biogeogr.* 40, 1170–1181.  
765        <https://doi.org/10.1111/jbi.12068>
- 766    DiBattista, J.D., Howard Choat, J., Gaither, M.R., Hobbs, J.P.A., Lozano-Cortés, D.F., Myers, R.F.,  
767        Paulay, G., Rocha, L.A., Toonen, R.J., Westneat, M.W., Berumen, M.L., 2016a. On the origin of  
768        endemic species in the Red Sea. *J. Biogeogr.* 43, 13–30. <https://doi.org/10.1111/jbi.12631>
- 769    DiBattista, J.D., Roberts, M.B., Bouwmeester, J., Bowen, B.W., Coker, D.J., Lozano-Cortés, D.F.,  
770        Howard Choat, J., Gaither, M.R., Hobbs, J.P.A., Khalil, M.T., Kochzius, M., Myers, R.F., Paulay,  
771        G., Robitzch, V.S.N., Saenz-Agudelo, P., Salas, E., Sinclair-Taylor, T.H., Toonen, R.J., Westneat,  
772        M.W., Williams, S.T., Berumen, M.L., 2016b. A review of contemporary patterns of endemism for  
773        shallow water reef fauna in the Red Sea. *J. Biogeogr.* 43, 423–439.  
774        <https://doi.org/10.1111/jbi.12649>
- 775    DiBattista, J.D., Rocha, L.A., Hobbs, J.-P.A., He, S., Priest, M.A., Sinclair-Taylor, T.H., Bowen, B.W.,  
776        Berumen, M.L., 2015. When biogeographical provinces collide: hybridization of reef fishes at the  
777        crossroads of marine biogeographical provinces in the Arabian Sea. *J. Biogeogr.* 42, 1601–1614.  
778        <https://doi.org/10.1111/jbi.12526>
- 779    Diekmann, O. E., Bak, R. P. M., Stam, W. T., & Olsen, J. L. 2001. Molecular genetic evidence for  
780        probable reticulate speciation in the coral genus *Madracis* from a Caribbean fringing reef slope.  
781        *Mar. Biol.* 139, 221–233. <https://doi.org/10.1007/s002270100584>

- 782 Dierckxsens, N., Mardulyn, P., Smits, G., 2016. NOVOPlasty: de novo assembly of organelle genomes  
783 from whole genome data. *Nucleic Acids Res.* 45, gkw955. <https://doi.org/10.1093/nar/gkw955>
- 784 Dixon, G.B., Davies, S.W., Aglyamova, G. V., Meyer, E., Bay, L.K., Matz, M. V., 2015. Genomic  
785 determinants of coral heat tolerance across latitudes. *Science.* 348, 1460–1462.  
786 <https://doi.org/10.1126/science.1261224>
- 787 Dokianakis, E., Ladoukakis, E.D., 2014. Different degree of paternal mtDNA leakage between male and  
788 female progeny in interspecific *Drosophila* crosses. *Ecol. Evol.* 4, 2633–2641.  
789 <https://doi.org/10.1002/ece3.1069>
- 790 Downs, C.A., Fauth, J.E., Halas, J.C., Dustan, P., Bemiss, J., Woodley, C.M., 2002. Oxidative stress and  
791 seasonal coral bleaching. *Free Radic. Biol. Med.* 33, 533–543.
- 792 Edgar, R.C., 2004. MUSCLE: multiple sequence alignment with high accuracy and high throughput.  
793 *Nucleic Acids Research.* 32, 1792–1797. <https://doi.org/10.1093/nar/gkh340>
- 794 Ehrenberg, C.G., 1834. Die Corallenthiere des Rothen Meeres physiologisch untersucht un systematisch  
795 verzeichnet. gedruckt in der Druckerei der K. Akademie der Wissenschafte, Berlin (156)
- 796 Esper, E.J.C., 1797. Fortsetzungen der Pflanzenthiere in Abbildungen nach der Natur mit Farben  
797 erleuchtet nebst Beschreibungen. Erster Theil. Raspische Buchhandlung, Nürnberg.
- 798 Excoffier, L., Lischer, H.E.L., 2010. Arlequin suite ver 3.5: A new series of programs to perform  
799 population genetics analyses under Linux and Windows. *Mol. Ecol. Resour.* 10, 564–567.  
800 <https://doi.org/10.1111/j.1755-0998.2010.02847.x>
- 801 Fine, M., Gildor, H., Genin, A., 2013. A coral reef refuge in the Red Sea. *Glob. Chang. Biol.* 19, 3640–  
802 3647. <https://doi.org/10.1111/gcb.12356>
- 803 Flot, J.F., 2010. seqphase: a web tool for interconverting phase input/output files and fasta sequence  
804 alignments. *Mol. Ecol. Resour.* 10, 162–166. <https://doi.org/10.1111/j.1755-0998.2009.02732.x>
- 805 Flot, J.F., Blanchot, J., Charpy, L., Cruaud, C., Licuanan, W.Y., Nakano, Y., Payri, C., Tillier, S., 2011.  
806 Incongruence between morphotypes and genetically delimited species in the coral genus  
807 *Stylophora*: phenotypic plasticity, morphological convergence, morphological stasis or interspecific  
808 hybridization? *BMC Ecol.* 11, 22. <https://doi.org/10.1186/1472-6785-11-22>
- 809 Flot, J.F., Tillier, S., 2007. The mitochondrial genome of *Pocillopora* (Cnidaria: Scleractinia) contains  
810 two variable regions: The putative D-loop and a novel ORF of unknown function. *Gene* 401, 80–  
811 87. <https://doi.org/10.1016/j.gene.2007.07.006>
- 812 Flot J.F., 2007. Towards a molecular taxonomy of corals of the genus *Pocillopora*. Ph.D. thesis,

- 813 (Muséum national d'Histoire naturelle, Paris).
- 814 Flot, J.F., Tillier, A., Samadi, S., Tillier, S., 2006. Phase determination from direct sequencing of length-  
815 variable DNA regions. *Mol. Ecol. Notes*. <https://doi.org/10.1111/j.1471-8286.2006.01355.x>
- 816 Forsman, Z.H., Knapp, I.S.S., Tisthammer, K., Eaton, D.A.R., Belcaid, M., Toonen, R.J., 2017. Coral  
817 hybridization or phenotypic variation? Genomic data reveal gene flow between *Porites lobata* and  
818 *P. Compressa*. *Mol. Phylogenet. Evol.* 111, 132–148. <https://doi.org/10.1016/j.ympev.2017.03.023>
- 819 Fourie, G., Van der Merwe, N.A., Wingfield, B.D., Bogale, M., Wingfield, M.J., Steenkamp, E.T., 2018.  
820 Mitochondrial introgression and interspecies recombination in the *Fusarium fujikuroi* species  
821 complex. *IMA Fungus* 9, 37–63. <https://doi.org/10.5598/imafungus.2018.09.01.04>
- 822 Froukh, T., Kochzius, M., 2008. Species boundaries and evolutionary lineages in the blue green  
823 damselfishes *Chromis viridis* and *Chromis atripectoralis* (Pomacentridae). *J. Fish Biol.* 72, 451–  
824 457. <https://doi.org/10.1111/j.1095-8649.2007.01746.x>
- 825 Froukh, T., Kochzius, M., 2007. Genetic population structure of the endemic fourline wrasse (*Larabicus*  
826 *quadrilineatus*) suggests limited larval dispersal distances in the Red Sea. *Mol. Ecol.* 16, 1359–  
827 1367. <https://doi.org/10.1111/j.1365-294X.2007.03236.x>
- 828 Gaither, M.R., Szabó, Z., Crepeau, M.W., Bird, C.E., Toonen, R.J., 2011. Preservation of corals in salt-  
829 saturated DMSO buffer is superior to ethanol for PCR experiments. *Coral Reefs* 30, 329–333.  
830 <https://doi.org/10.1007/s00338-010-0687-1>
- 831 Galtier, N., 2011. The intriguing evolutionary dynamics of plant mitochondrial DNA. *BMC Biol.* 9, 61.  
832 <https://doi.org/10.1186/1741-7007-9-61>
- 833 Garzón-Ospina, D., López, C., Forero-Rodríguez, J., Patarroyo, M.A., 2012. Genetic Diversity and  
834 Selection in Three *Plasmodium vivax* Merozoite Surface Protein 7 (PvmSP-7) Genes in a  
835 Colombian Population. *PLoS One* 7, e45962. <https://doi.org/10.1371/journal.pone.0045962>
- 836 Gibbs, M.J., Armstrong, J.S., Gibbs, A.J., 2000. Sister-Scanning: a Monte Carlo procedure for assessing  
837 signals in recombinant sequences. *Bioinformatics* 16, 573–582.  
838 <https://doi.org/10.1093/bioinformatics/16.7.573>
- 839 Gompert, Z., Forister, M.L., Fordyce, J.A., Nice, C.C., 2008. Widespread mito-nuclear discordance with  
840 evidence for introgressive hybridization and selective sweeps in *Lycaeides*. *Mol. Ecol.* 17, 5231–  
841 5244. <https://doi.org/10.1111/j.1365-294X.2008.03988.x>
- 842 Guindon, S., Dufayard, J.-F., Lefort, V., Anisimova, M., Hordijk, W., Gascuel, O., 2010. New  
843 algorithms and methods to estimate Maximum-Likelihood phylogenies: Assessing the performance

- 844 of PhyML 2.0. Syst. Biol. <https://doi.org/10.1093/sysbio/syq010>
- 845 Harrison, R.G., Larson, E.L., 2014. Hybridization, Introgression, and the nature of species boundaries. J.
- 846 Hered. 105, 795–809. <https://doi.org/10.1093/jhered/esu033>
- 847 Hellberg, M.E., Prada, C., Tan, M.H., Forsman, Z.H., Baums, I.B., 2016. Getting a grip at the edge:
- 848 recolonization and introgression in eastern Pacific *Porites* corals. J. Biogeogr. 43, 2147–2159.
- 849 <https://doi.org/10.1111/jbi.12792>
- 850 Hewitt, G.M., 1988. Hybrid zones-natural laboratories for evolutionary studies. Trends Ecol. Evol. 3,
- 851 158–167. [https://doi.org/10.1016/0169-5347\(88\)90033-X](https://doi.org/10.1016/0169-5347(88)90033-X)
- 852 Hill, G.E., 2017. The mitonuclear compatibility species concept. Auk 134, 393–409.
- 853 <https://doi.org/10.1642/AUK-16-201.1>
- 854 Hill, G.E., 2016. Mitonuclear coevolution as the genesis of speciation and the mitochondrial DNA
- 855 barcode gap. Ecol. Evol. 6, 5831–5842. <https://doi.org/10.1002/ece3.2338>
- 856 Huelsenbeck, J.P., Ronquist, F., 2001. Mr. BAYES: Bayesian inference of phylogenetic trees.
- 857 Bioinformatics 17, 754–755. <https://doi.org/10.1093/bioinformatics/17.8.754>
- 858 Hughes, T.P., Kerry, J.T., Baird, A.H., Connolly, S.R., Dietzel, A., Eakin, C.M., Heron, S.F., Hoey,
- 859 A.S., Hoogenboom, M.O., Liu, G., McWilliam, M.J., Pears, R.J., Pratchett, M.S., Skirving, W.J.,
- 860 Stella, J.S., Torda, G., 2018. Global warming transforms coral reef assemblages. Nature 556, 492–
- 861 496. <https://doi.org/10.1038/s41586-018-0041-2>
- 862 Johannesson, K., Carl, A., 2006. Life on the margin: genetic isolation and diversity loss in a peripheral
- 863 marine ecosystem, the Baltic Sea. Mol. Ecol. 15, 2013–2029. [https://doi.org/10.1111/j.1365-](https://doi.org/10.1111/j.1365-294X.2006.02919.x)
- 864 [294X.2006.02919.x](https://doi.org/10.1111/j.1365-294X.2006.02919.x)
- 865 Johnston, E.C., Forsman, Z.H., Flot, J.-F., Schmidt-Roach, S., Pinzón, J.H., Knapp, I.S.S., Toonen, R.J.,
- 866 2017. A genomic glance through the fog of plasticity and diversification in *Pocillopora*. Sci. Rep.
- 867 7, 5991. <https://doi.org/10.1038/s41598-017-06085-3>
- 868 Katoh, K., Standley, D.M., 2013. MAFFT Multiple Sequence Alignment Software Version 7:
- 869 Improvements in Performance and Usability. Mol. Biol. Evol. 30, 772–780.
- 870 <https://doi.org/10.1093/molbev/mst010>
- 871 Keshavmurthy, S., Yang, S.-Y., Alamaru, A., Chuang, Y.-Y., Pichon, M., Obura, D., Fontana, S., De
- 872 Palmas, S., Stefani, F., Benzoni, F., MacDonald, A., Noreen, A.M.E., Chen, C., Wallace, C.C.,
- 873 Pillay, R.M., Denis, V., Amri, A.Y., Reimer, J.D., Mezaki, T., Sheppard, C., Loya, Y., Abelson, A.,
- 874 Mohammed, M.S., Baker, A.C., Mostafavi, P.G., Suharsono, B.A., Chen, C.A., 2013. DNA

- 875 barcoding reveals the coral “laboratory-rat”, *Stylophora pistillata* encompasses multiple identities.  
876 Sci. Rep. 3, 1520. <https://doi.org/10.1038/srep01520>
- 877 Kivisild, T., 2015. Maternal ancestry and population history from whole mitochondrial genomes.  
878 Investig. Genet. 6, 3. <https://doi.org/10.1186/s13323-015-0022-2>
- 879 Klueter, A., Andreakis, N., 2013. Assessing genetic diversity in the scleractinian coral *Stylophora*  
880 *pistillata* (Esper 1797) from the Central Great Barrier Reef and the Coral Sea. Syst. Biodivers. 11,  
881 67–76. <https://doi.org/10.1080/14772000.2013.770419>
- 882 Kühlbrandt, W., 2015. Structure and function of mitochondrial membrane protein complexes. BMC  
883 Biol. 13, 89. <https://doi.org/10.1186/s12915-015-0201-x>
- 884 Kuijper, B., Lane, N., Pomiankowski, A., 2015. Can paternal leakage maintain sexually antagonistic  
885 polymorphism in the cytoplasm? J. Evol. Biol. 28, 468–480. <https://doi.org/10.1111/jeb.12582>
- 886 Kumar, S., Stecher, G., Tamura, K., 2016. MEGA7: Molecular Evolutionary Genetics Analysis Version  
887 7.0 for Bigger Datasets. Mol. Biol. Evol. 33, 1870–1874. <https://doi.org/10.1093/molbev/msw054>
- 888 Kvitt, H., Rosenfeld, H., Tchernov, D., 2016. The regulation of thermal stress induced apoptosis in  
889 corals reveals high similarities in gene expression and function to higher animals. Sci. Rep. 6,  
890 30359. <https://doi.org/10.1038/srep30359>
- 891 Ladoukakis, E.D., Zouros, E., 2017. Evolution and inheritance of animal mitochondrial DNA: Rules and  
892 exceptions. J. Biol. Res. 24, 1–7. <https://doi.org/10.1186/s40709-017-0060-4>
- 893 Lamb, A.M., Gan, H.M., Greening, C., Joseph, L., Lee, Y.P., Morán-Ordóñez, A., Sunnucks, P.,  
894 Pavlova, A., 2018. Climate-driven mitochondrial selection: A test in Australian songbirds. Mol.  
895 Ecol. 27, 898–918. <https://doi.org/10.1111/mec.14488>
- 896 Leducq, J.-B., Henault, M., Charron, G., Nielly-Thibault, L., Terrat, Y., Fiumera, H.L., Shapiro, B.J.,  
897 Landry, C.R., 2017. Mitochondrial recombination and introgression during speciation by  
898 Hybridization. Mol. Biol. Evol. 34, 1947–1959. <https://doi.org/10.1093/molbev/msx139>
- 899 Levensen, N., Bergero, R., Charlesworth, D., Wolff, K., 2016. Frequent, geographically structured  
900 heteroplasmy in the mitochondria of a flowering plant, ribwort plantain (*Plantago lanceolata*).  
901 Heredity (Edinb). 117, 1–7. <https://doi.org/10.1038/hdy.2016.15>
- 902 Librado, P., Rozas, J., 2009. DnaSP v5: A software for comprehensive analysis of DNA polymorphism  
903 data. Bioinformatics 25, 1451–1452. <https://doi.org/10.1093/bioinformatics/btp187>
- 904 Lobley, A., Sadowski, M.I., Jones, D.T., 2009. pGenTHREADER and pDomTHREADER: new  
905 methods for improved protein fold recognition and superfamily discrimination. Bioinformatics 25,

- 906 1761–1767. <https://doi.org/10.1093/bioinformatics/btp302>
- 907 Martin, D.P., Lemey, P., Lott, M., Moulton, V., Posada, D., Lefevre, P., 2010. RDP3: A flexible and  
908 fast computer program for analyzing recombination. *Bioinformatics* 26, 2462–2463.  
909 <https://doi.org/10.1093/bioinformatics/btq467>
- 910 Martin, D.P., Murrell, B., Golden, M., Khoosal, A., Muhire, B., 2015. RDP4: Detection and analysis of  
911 recombination patterns in virus genomes. *Virus Evol.* 1, vev003. <https://doi.org/10.1093/ve/vev003>
- 912 Martin, D.P., Posada, D., Crandall, K.A., Williamson, C., 2005. A modified Bootscan algorithm for  
913 automated identification of recombinant sequences and recombination breakpoints. *AIDS Res.*  
914 *Hum. Retroviruses* 21, 98–102. <https://doi.org/10.1089/aid.2005.21.98>
- 915 Mastrantonio, V., Porretta, D., Urbanelli, S., Crasta, G., Nascetti, G., 2016. Dynamics of mtDNA  
916 introgression during species range expansion: insights from an experimental longitudinal study.  
917 *Sci. Rep.* 6, 30355. <https://doi.org/10.1038/srep30355>
- 918 Mayer, M.P., Bukau, B., 2005. Hsp70 chaperones: Cellular functions and molecular mechanism. *Cell.*  
919 *Mol. Life Sci.* 62, 670–684. <https://doi.org/10.1007/s00018-004-4464-6>
- 920 Miller, M.A., Pfeiffer, W., Schwartz, T., 2010. Creating the CIPRES Science Gateway for inference of  
921 large phylogenetic trees, in: 2010 Gateway Computing Environments Workshop (GCE). IEEE, pp.  
922 1–8. <https://doi.org/10.1109/GCE.2010.5676129>
- 923 Morales, H.E., Pavlova, A., Joseph, L., Sunnucks, P., 2015. Positive and purifying selection in  
924 mitochondrial genomes of a bird with mitonuclear discordance. *Mol. Ecol.* 24, 2820–37.  
925 <https://doi.org/10.1111/mec.13203>
- 926 Moustafa, M.Z., Hallock, P., 2008. Observations of a Red Sea Fringing Coral Reef under Extreme  
927 Environmental Conditions. 11th Int. Coral Reef Symp. Ft. Lauderdale, Florida 7–11.
- 928 Moustafa, M.Z., Moustafa, M.S., Moustafa, Z.D., Moustafa, S.E., 2014. Survival of high latitude  
929 fringing corals in extreme temperatures: Red Sea oceanography. *J. Sea Res.* 88, 144–151.  
930 <https://doi.org/10.1016/j.seares.2014.01.012>
- 931 Nanninga, G.B., Saenz-Agudelo, P., Manica, A., Berumen, M.L., 2014. Environmental gradients predict  
932 the genetic population structure of a coral reef fish in the Red Sea. *Mol. Ecol.* 23, 591–602.  
933 <https://doi.org/10.1111/mec.12623>
- 934 Padidam, M., Sawyer, S., Fauquet, C.M., 1999. Possible emergence of new gemini viruses by frequent  
935 recombination. *Virology* 265, 218–225. <https://doi.org/10.1006/viro.1999.0056>
- 936 Pandolfi, J.M., Connolly, S.R., Marshall, D.J., Cohen, A.L., 2011. Projecting coral reef futures under

- 937 global warming and ocean acidification. *Science*. 333, 418–422.  
938 <https://doi.org/10.1126/science.1204794>
- 939 Passamonti, M., Ghiselli, F., Milani, L., 2013. Mitochondrial Inheritance, in: *Brenner's Encyclopedia of*  
940 *Genetics*. Elsevier, pp. 443–445. <https://doi.org/10.1016/B978-0-12-374984-0.00960-8>
- 941 Pavlova, A., Amos, J.N., Joseph, L., Loynes, K., Austin, J.J., Keogh, J.S., Stone, G.N., Nicholls, J.A.,  
942 Sunnucks, P., 2013. Perched at the mito-nuclear crossroads: divergent mitochondrial lineages  
943 correlate with environment in the face of ongoing nuclear gene flow in an Australian bird.  
944 *Evolution*. 67, 3412–3428. <https://doi.org/10.1111/evo.12107>
- 945 Pellissier, L., Leprieur, F., Parravicini, V., Cowman, P.F., Kulbicki, M., Litsios, G., Olsen, S.M., Wisz,  
946 M.S., Bellwood, D.R., Mouillot, D., 2014. Quaternary coral reef refugia preserved fish diversity.  
947 *Science*. 344, 1016–1019. <https://doi.org/10.1126/science.1249853>
- 948 Peris, D., Arias, A., Orlić, S., Belloch, C., Pérez-Través, L., Querol, A., Barrio, E., 2017. Mitochondrial  
949 introgression suggests extensive ancestral hybridization events among *Saccharomyces* species.  
950 *Mol. Phylogenet. Evol.* 108, 49–60. <https://doi.org/10.1016/j.ympev.2017.02.008>
- 951 Piganeau, G., Gardner, M., Eyre-Walker, A., 2004. A broad survey of recombination in animal  
952 mitochondria. *Mol. Biol. Evol.* <https://doi.org/10.1093/molbev/msh244>
- 953 Posada, D., Crandall, K.A., 2001. Evaluation of methods for detecting recombination from DNA  
954 sequences: Computer simulations. *Proc. Natl. Acad. Sci.* 98, 13757–13762.  
955 <https://doi.org/10.1073/pnas.241370698>
- 956 Raitos, D.E., Pradhan, Y., Brewin, R.J.W., Stenchikov, G., Hoteit, I., 2013. Remote Sensing the  
957 Phytoplankton Seasonal Succession of the Red Sea. *PLoS One* 8, e64909.  
958 <https://doi.org/10.1371/journal.pone.0064909>
- 959 Rambaut, A., Drummond, A.J., 2009. Tracer v 1.5. <http://beast.bio.ed.ac.uk/Tracer>.
- 960 Richards, Z.T., Hobbs, J.P.A., 2015. Hybridisation on coral reefs and the conservation of evolutionary  
961 novelty. *Curr. Zool.* 61, 132–145. <https://doi.org/10.1093/czoolo/61.1.132>
- 962 Righton, D., Kemp, J., Ormond, R., 1996. Biogeography community structure and diversity of Red Sea  
963 and western Indian Ocean butterflyfishes. *J. Mar. Biol. Assoc. United Kingdom* 76, 223–228.
- 964 Riginos, C., Cunningham, C.W., 2004. Invited Review: Local adaptation and species segregation in two  
965 mussel (*Mytilus edulis* × *Mytilus trossulus*) hybrid zones. *Mol. Ecol.* 14, 381–400.  
966 <https://doi.org/10.1111/j.1365-294X.2004.02379.x>
- 967 Roberts, M.B., Jones, G.P., McCormick, M.I., Munday, P.L., Neale, S., Thorrold, S., Robitzsch, V.S.N.,



- 968 Berumen, M.L., 2016. Homogeneity of coral reef communities across 8 degrees of latitude in the  
969 Saudi Arabian Red Sea. *Mar. Pollut. Bull.* 105, 558–565.  
970 <https://doi.org/10.1016/j.marpolbul.2015.11.024>
- 971 Rohling, E.J., Grant, K., Hemleben, C., Siddall, M., Hoogakker, B.A.A., Bolshaw, M., Kucera, M.,  
972 2008. High rates of sea-level rise during the last interglacial period. *Nat. Geosci.* 1, 38–42.  
973 <https://doi.org/10.1038/ngeo.2007.28>
- 974 Rohling, E.J., Grant, K.M., Roberts, A.P., Larrasoana, J.-C., 2013. Paleoclimate variability in the  
975 mediterranean and red sea regions during the last 500,000 years. *Curr. Anthropol.* 54, S183–S201.  
976 <https://doi.org/10.1086/673882>
- 977 Rokas, A., Ladoukakis, E., Zouros, E., 2003. Animal mitochondrial DNA recombination revisited.  
978 *Trends Ecol. Evol.* 18, 411–417. [https://doi.org/10.1016/S0169-5347\(03\)00125-3](https://doi.org/10.1016/S0169-5347(03)00125-3)
- 979 Saenz-Agudelo, P., Dibattista, J.D., Piatek, M.J., Gaither, M.R., Harrison, H.B., Nanninga, G.B.,  
980 Berumen, M.L., 2015. Seascape genetics along environmental gradients in the Arabian Peninsula:  
981 insights from ddRAD sequencing of anemonefishes. *Mol. Ecol.* 24, 6241–6255.  
982 <https://doi.org/10.1111/mec.13471>
- 983 Salvi, D., Pinho, C., Harris, D.J., 2017. Digging up the roots of an insular hotspot of genetic diversity:  
984 Decoupled mito-nuclear histories in the evolution of the Corsican-Sardinian endemic lizard  
985 *Podarcis tiliguerta*. *BMC Evol. Biol.* 17. <https://doi.org/10.1186/s12862-017-0899-x>
- 986 Sawall, Y., Al-Sofyani, A., Banguera-Hinestroza, E., Voolstra, C.R., 2014. Spatio-temporal analyses of  
987 *symbiodinium* physiology of the coral *Pocillopora verrucosa* along large-scale nutrient and  
988 temperature gradients in the Red Sea. *PLoS One* 9, e103179.  
989 <https://doi.org/10.1371/journal.pone.0103179>
- 990 Sawall, Y., Al-Sofyani, A., Hohn, S., Banguera-Hinestroza, E., Voolstra, C.R., Wahl, M., 2015.  
991 Extensive phenotypic plasticity of a Red Sea coral over a strong latitudinal temperature gradient  
992 suggests limited acclimatization potential to warming. *Sci. Rep.* 5, 8940.  
993 <https://doi.org/10.1038/srep08940>
- 994 Scheer, G., Pillai, C.S.G., 1983. Report on the stony corals from the Red Sea. *Zoologica* 131, 1–198.
- 995 Seutin, G., White, B.N., Boag, P., 1991. Preservation of avian blood and tissue samples for DNA  
996 analyses. *Can. J. Zool.* 69, 89–90.
- 997 Shearer, T.L., Oppen, M.J.H. Van, Romano, S.L., G. Worheire, 2002. Slow mitochondria DNA  
998 sequence evolution in the Anthozoa. *Mol. Ecol.* 11, 2475–2487.

- 999 Siddall, M., Rohling, E.J., Almogi-Labin, A., Hemleben, C., Meischner, D., Schmelzer, I., Smeed, D. a,  
1000 2003. Sea-level fluctuations during the last glacial cycle. *Nature* 423, 853–858.  
1001 <https://doi.org/10.1038/nature01690>
- 1002 Siddall, M., Smeed, D.A., Hemleben, C., Rohling, E.J., Schmelzer, I., Peltier, W.R., 2004.  
1003 Understanding the Red Sea response to sea level. *Earth Planet. Sci. Lett.* 225, 421–434.  
1004 [https://doi.org/DOI 10.1016/j.epsl.2004.06.008](https://doi.org/DOI%2010.1016/j.epsl.2004.06.008)
- 1005 Smith, D.J., Suggett, D.J., Baker, N.R., 2005. Is photoinhibition of zooxanthellae photosynthesis the  
1006 primary cause of thermal bleaching in corals? *Glob. Chang. Biol.* 11, 1–11.  
1007 <https://doi.org/10.1111/j.1529-8817.2003.00895.x>
- 1008 Smith, J., 1992. Analyzing the mosaic structure of genes. *J. Mol. Evol.* 34.  
1009 <https://doi.org/10.1007/BF00182389>
- 1010 Stefani, F., Benzoni, F., Yang, S.-Y., Pichon, M., Galli, P., Chen, C.A., 2011. Comparison of  
1011 morphological and genetic analyses reveals cryptic divergence and morphological plasticity in  
1012 *Stylophora* (Cnidaria, Scleractinia). *Coral Reefs* 30, 1033–1049. [https://doi.org/10.1007/s00338-](https://doi.org/10.1007/s00338-011-0797-4)  
1013 [011-0797-4](https://doi.org/10.1007/s00338-011-0797-4)
- 1014 Stephens, M., Donnelly, P., 2003. A Comparison of bayesian methods for haplotype reconstruction from  
1015 population genotype data. *Am. J. Hum. Genet.* 73, 1162–1169. <https://doi.org/10.1086/379378>
- 1016 Taviani, M., 1998. Post-Miocene reef faunas of the Red Sea: glacio-eustatic controls, in: *Sedimentation*  
1017 *and tectonics in rift basins Red Sea-Gulf of Aden*. Springer Netherlands, Dordrecht, pp. 574–582.  
1018 [https://doi.org/10.1007/978-94-011-4930-3\\_30](https://doi.org/10.1007/978-94-011-4930-3_30)
- 1019 Taylor, S.A., Larson, E.L., Harrison, R.G., 2015. Hybrid zones: windows on climate change. *Trends*  
1020 *Ecol. Evol.* 30, 398–406. <https://doi.org/10.1016/j.tree.2015.04.010>
- 1021 Toews, David P.L. Brelsford, A., 2012. The biogeography of mitochondrial and nuclear discordance in  
1022 animals. *Mol. Ecol.* 21, 3907–3930. <https://doi.org/10.1111/j.1365-294X.2012.05664.x>
- 1023 Tsaousis, A.D., Martin, D.P., Ladoukakis, E.D., Posada, D., Zouros, E., 2005. Widespread  
1024 recombination in published animal mtDNA sequences. *Mol. Biol. Evol.* 22, 925–933.  
1025 <https://doi.org/10.1093/molbev/msi084>
- 1026 Ujvari, B., Dowton, M., Madsen, T., 2007. Mitochondrial DNA recombination in a free-ranging  
1027 Australian lizard. *Biol. Lett.* 3, 189–192. <https://doi.org/10.1098/rsbl.2006.0587>
- 1028 Van Oppen, M.J.H., McDonald, B.J., Willis, B., Miller, D.J., 2001. The evolutionary history of the coral  
1029 genus *Acropora* (Scleractinia, Cnidaria) based on a mitochondrial and a nuclear marker:

- 1030           reticulation, incomplete lineage sorting, or morphological convergence? *Mol. Biol. Evol.* 18, 1315–  
1031           1329. <https://doi.org/11420370>
- 1032 Veron, J.E., 1995. J. E. N. Veron, 1995. Corals in space and time: the biogeography and evolution of  
1033           the Scleractinia. Cornell Univ. Press. <https://doi.org/10.1017/S0016756800008050>
- 1034 Veron, J.E. E.N., 2002. New Species Described in Corals of the World. *Science*. 11, 205.
- 1035 Vollmer, S. V., Palumbi, S.R., 2002. Hybridization and the evolution of reef coral diversity. *Science*.  
1036           296, 2023–2025. <https://doi.org/10.1126/science.1069524>
- 1037 White, D.J., Wolff, J.N., Pierson, M., Gemmell, N.J., 2008. Revealing the hidden complexities of  
1038           mtDNA inheritance. *Mol. Ecol.* 17, 4925–42. <https://doi.org/10.1111/j.1365-294X.2008.03982.x>
- 1039 Willis, B.L., van Oppen, M.J.H., Miller, D.J., Vollmer, S. V., Ayre, D.J., 2006. The role of hybridization  
1040           in the evolution of reef corals. *Annu. Rev. Ecol. Evol. Syst.* 37, 489–517.  
1041           <https://doi.org/10.1146/annurev.ecolsys.37.091305.110136>
- 1042 Wilton, P.R., Zaidi, A., Makova, K., Nielsen, R., 2018. A population phylogenetic view of  
1043           mitochondrial heteroplasmy. *Genetics* 208, 1261–1274.  
1044           <https://doi.org/10.1534/genetics.118.300711>
- 1045 Wirth, C., Brandt, U., Hunte, C., Zickermann, V., 2016. Structure and function of mitochondrial  
1046           complex I. *Biochim. Biophys. Acta - Bioenerg.* 1857, 902–914.  
1047           <https://doi.org/10.1016/j.bbabi.2016.02.013>
- 1048 Wolff, J.N., Pichaud, N., Camus, M.F., Côté, G., Blier, P.U., Dowling, D.K., 2016. Evolutionary  
1049           implications of mitochondrial genetic variation: mitochondrial genetic effects on OXPHOS  
1050           respiration and mitochondrial quantity change with age and sex in fruit flies. *J. Evol. Biol.* 29, 736–  
1051           747. <https://doi.org/10.1111/jeb.12822>

Figure 1.

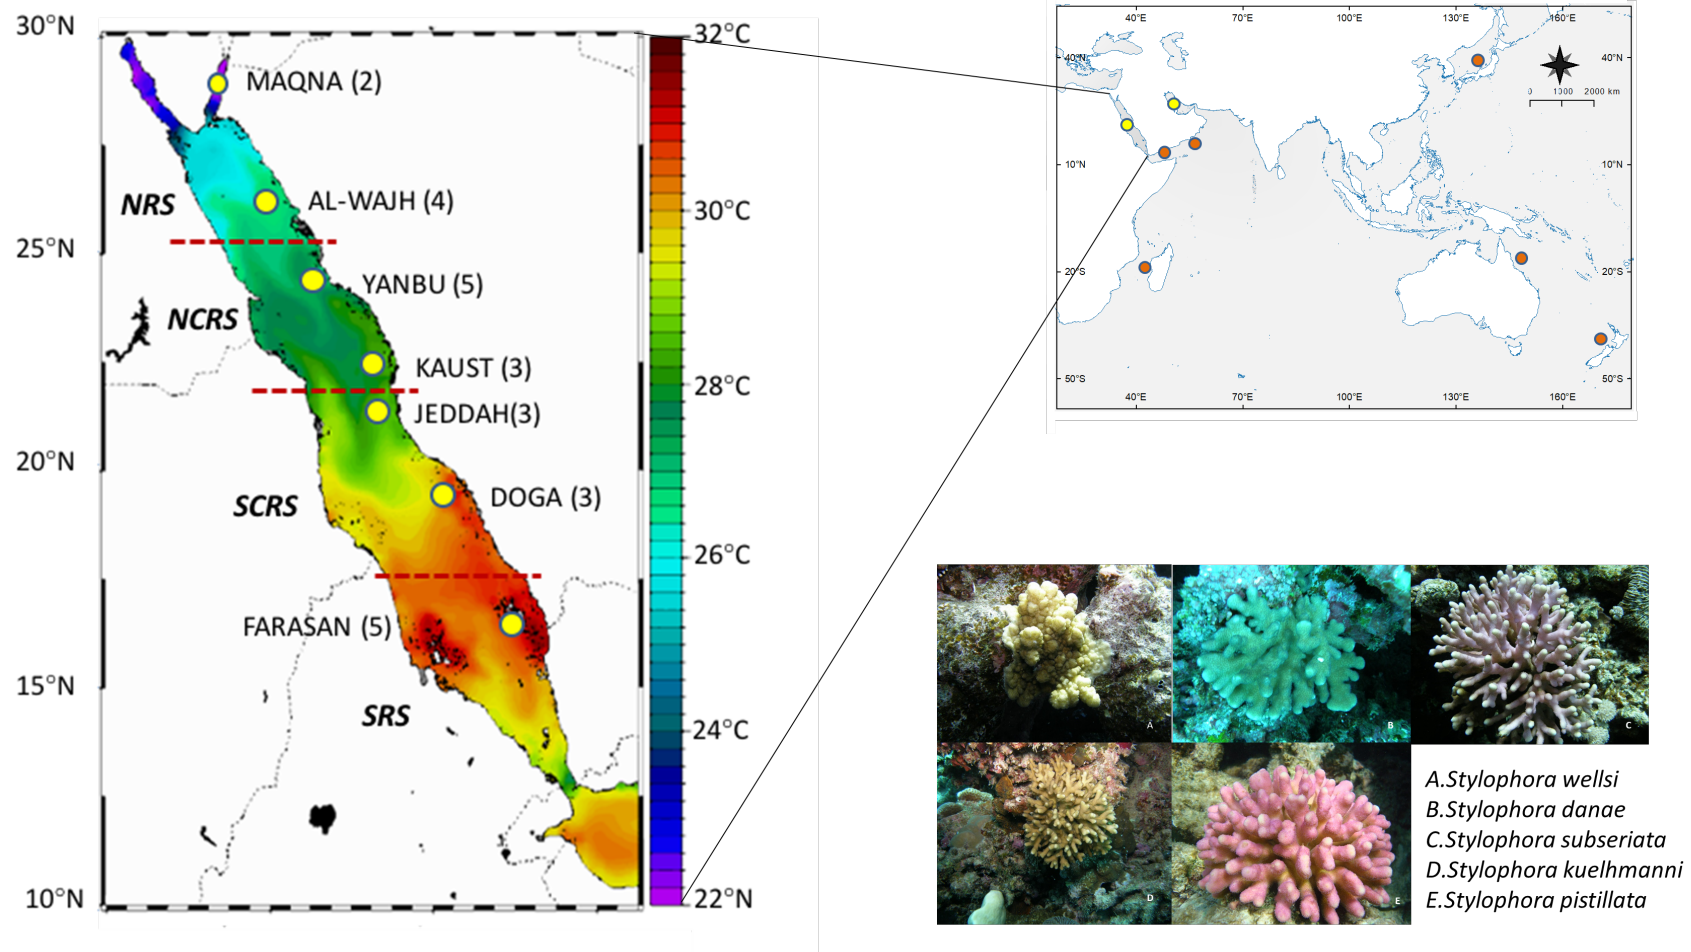

Sampling sites and *Stylophora* morphotypes collected in this study. Red Lines are indicating the barriers in oceanographic provinces described by Raitsois et al., (2013). Yellow points are sampling localities visited during this study. Reefs sampled in each location are included in parenthesis. Red points are sequences from other studies. The map was modified from the original downloaded from [https://www7320.nrlssc.navy.mil/global\\_ncom/glb8\\_3b/html/Links/red/temp\\_glb8\\_3b\\_2012060700\\_0000m.gif](https://www7320.nrlssc.navy.mil/global_ncom/glb8_3b/html/Links/red/temp_glb8_3b_2012060700_0000m.gif)

Figure 2.

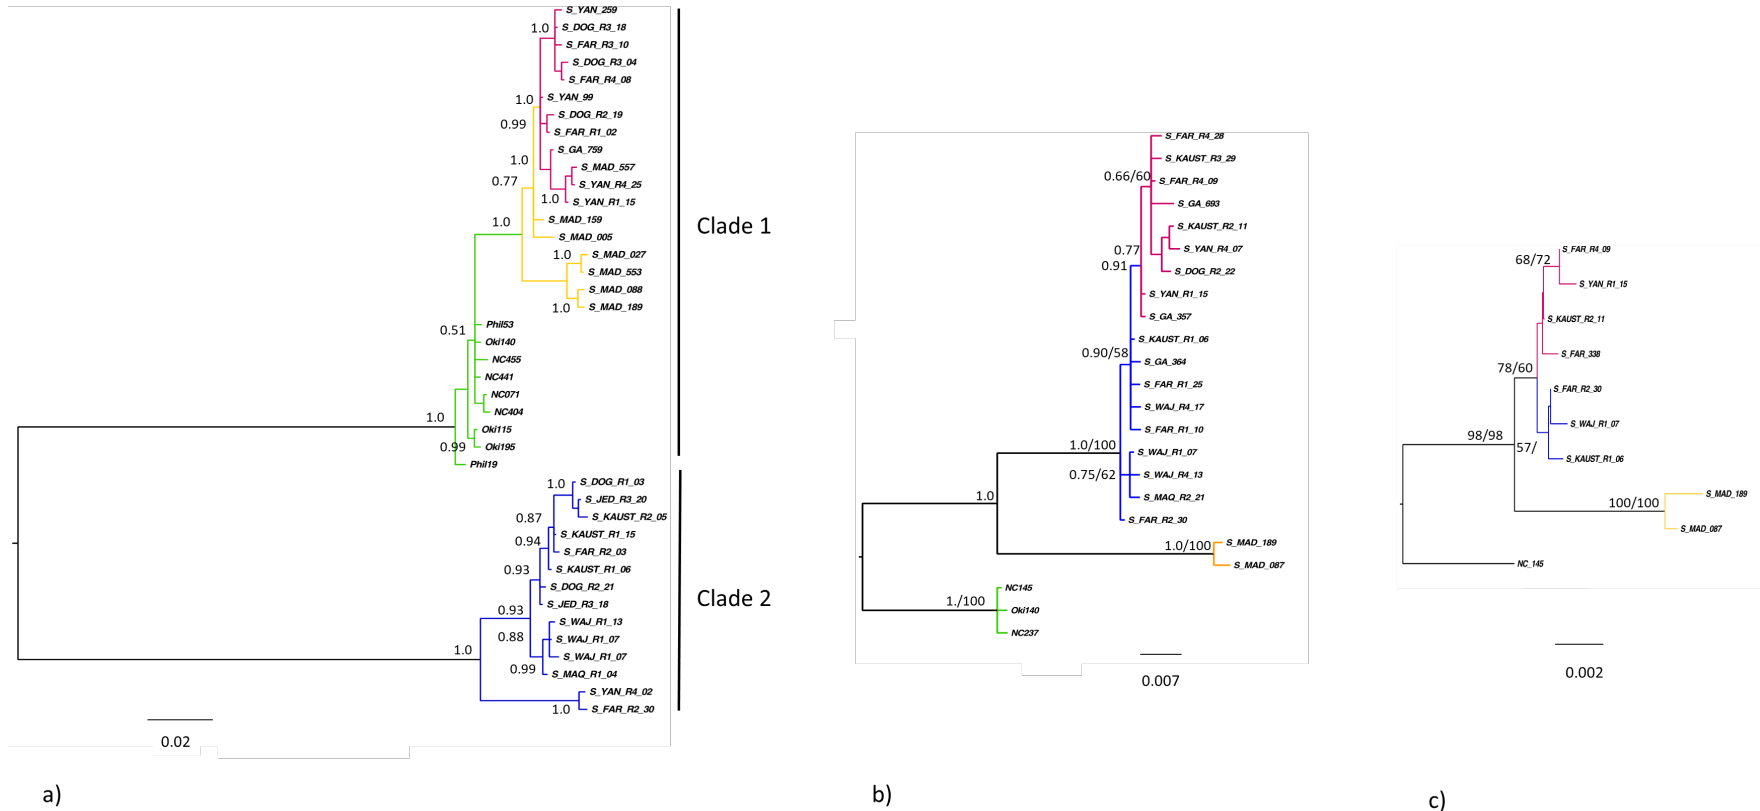

Mitochondrial phylogenies of the genus *Stylophora*. a). Bayesian tree of the *atp6*-*mtORF* locus. b). Bayesian tree for the CR gene and c). Maximum Likelihood (ML) tree for the 12S gene. Node support are given in Bayesian Probabilities (BPP) for the *mtORF*, BPP/ML for the *mtCR* and ML/NJ for the 12S. Colors are as follow: Red: Haplotypes from Arabian Gulf, Red Sea and Gulf of Aden placed in Clade 1 (*RS\_LinA*). Yellow: haplotypes from Madagascar. Green: haplotypes from Indo-Pacific (Philippines, Okinawa, New Caledonia) and Blue: Red Sea and Gulf of Aden haplotypes placed in Clade 2 (*RS\_LinB*). Haplotypes names are given in agreement to the region where the haplotype was found in higher frequency (MAQ=MAQNA, WAJ=ALWAJH, YAN=YANBU, KAUST = KAUST, JEDDAH=JED, DOG = DOGA, FARASAN = FAR).

Figure 3.

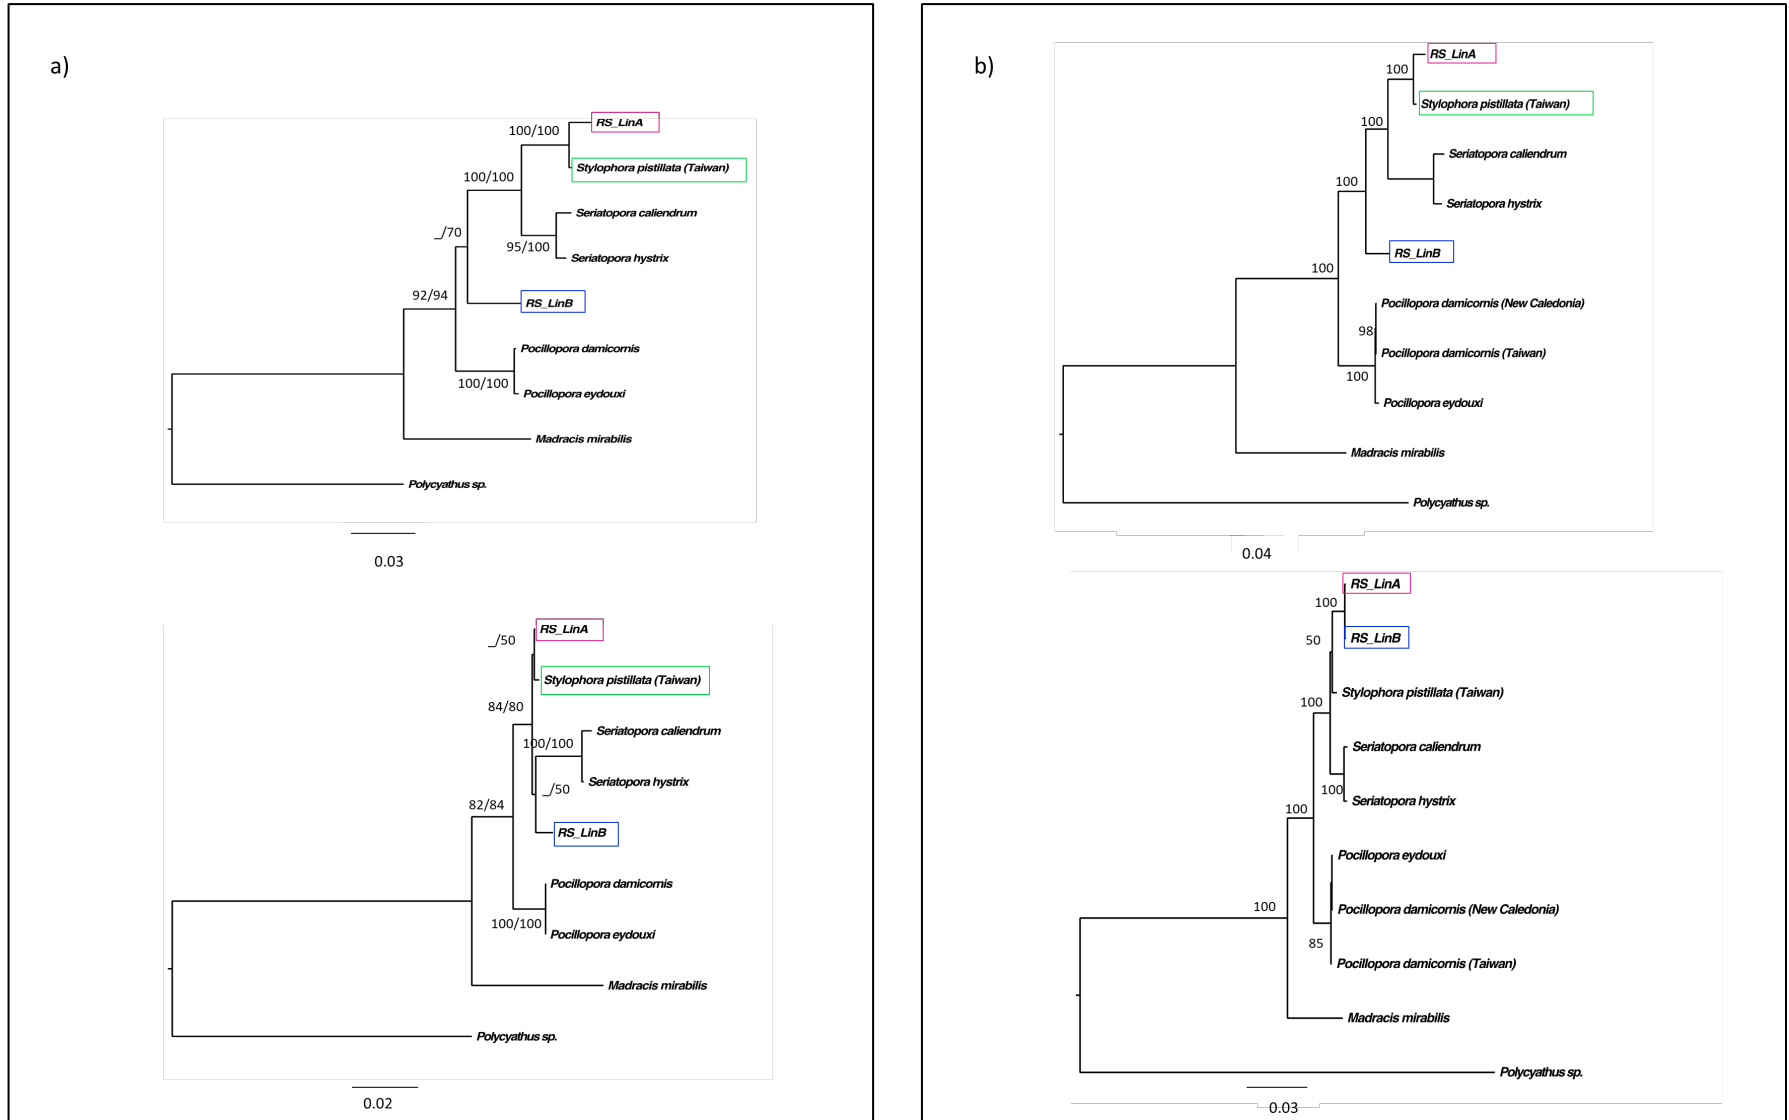

Mitochondrial phylogenies of the family Pocilloporidae and recombination analyses. a) Position of the *RS\_LinA* and *RS\_LinB* in a family phylogeny of the full *atp6* (above) and *nd6* genes (below). b). ML phylogenies from the recombination hypotheses: phylogeny derived from the recombinant region –minor parent–, including the *nd6*, *atp6*, and *mtORF* genes; 2415bp (above) and phylogeny from mtDNA genes outside the recombinant region –from the major parent – 9555bp (below).

Figure 4.

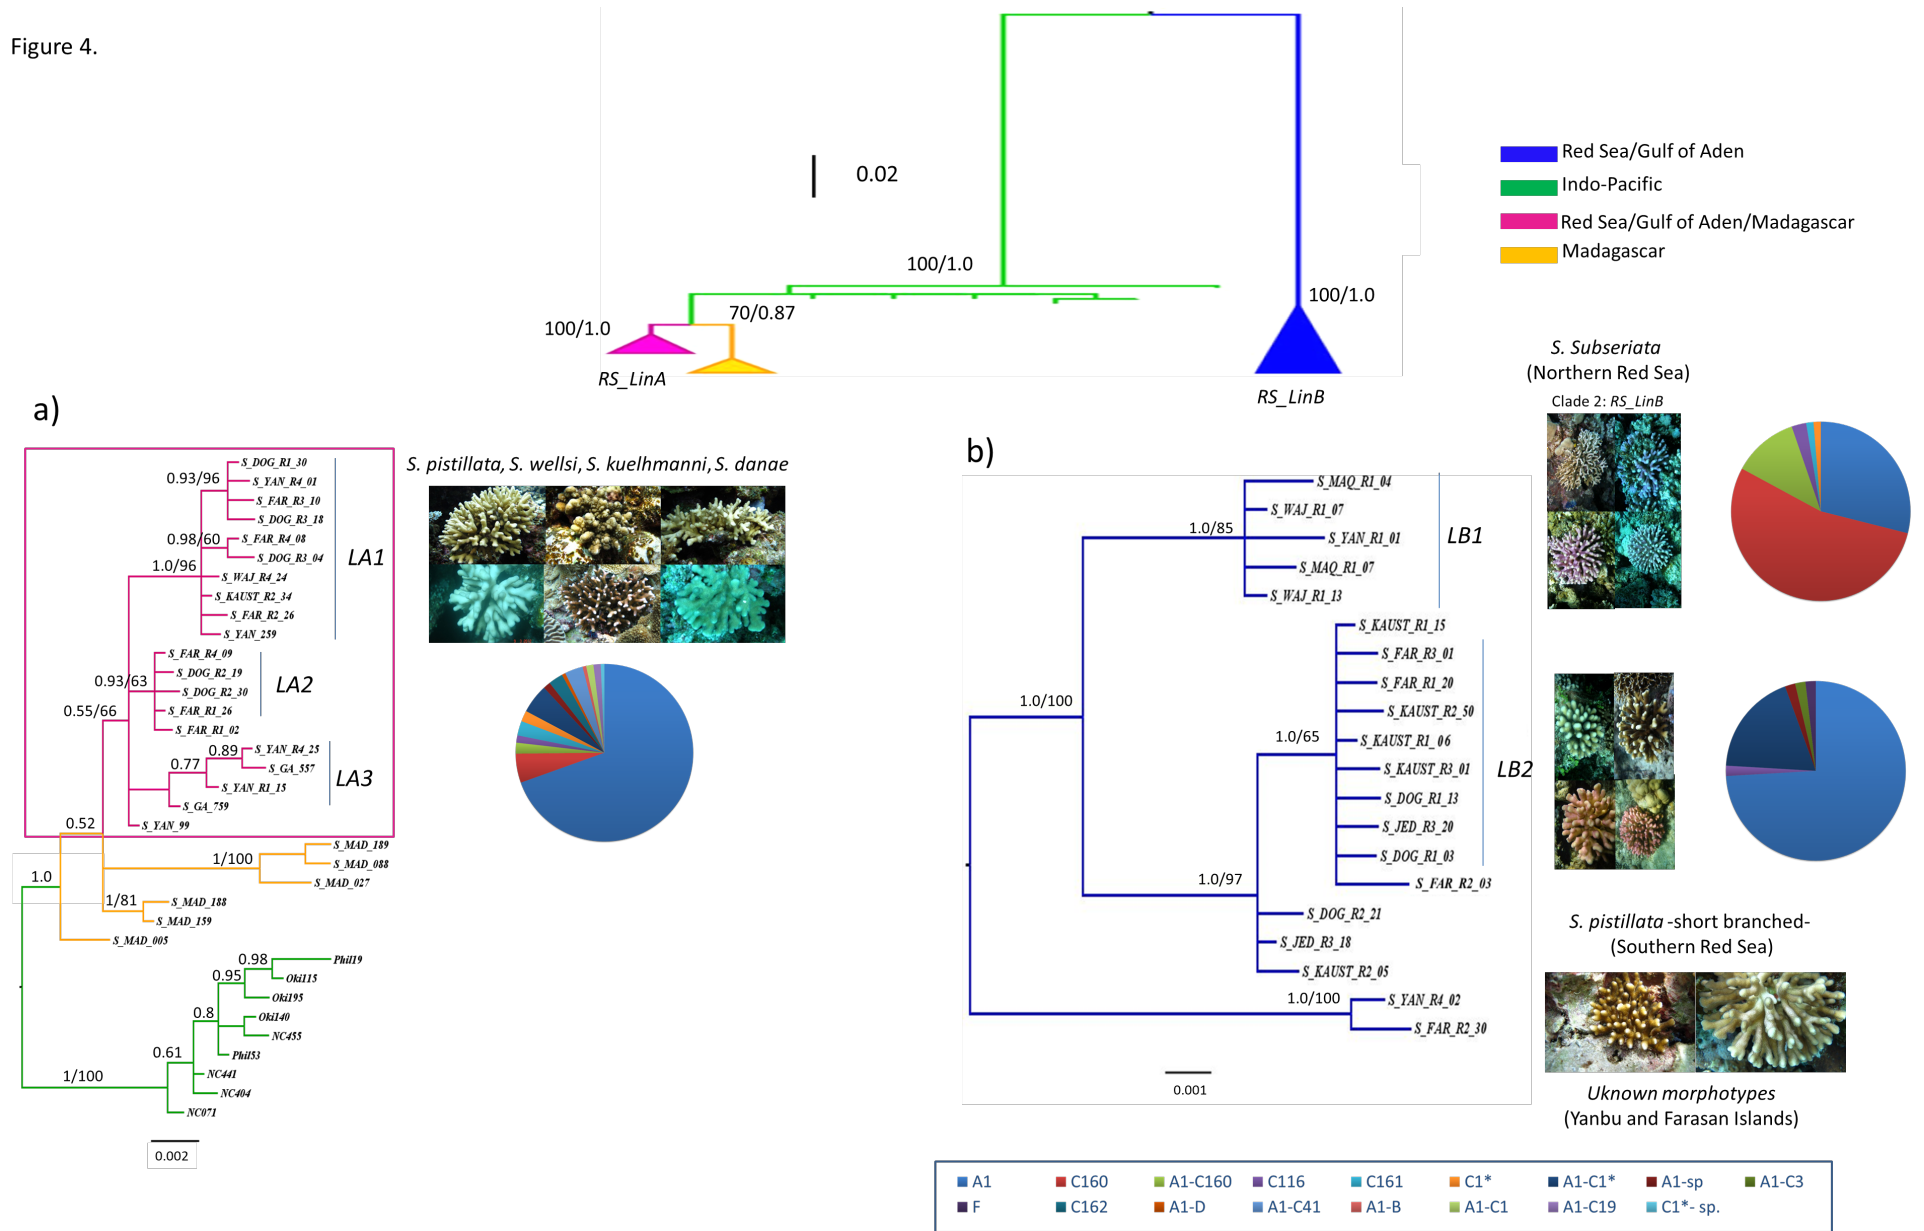

Extended *atp6*-mtORF phylogenies for a). *RS\_LinA* and b). *RS\_LinB*. Morphotypes and *Symbiodinium* types associated with each lineage are shown.

Figure 5.

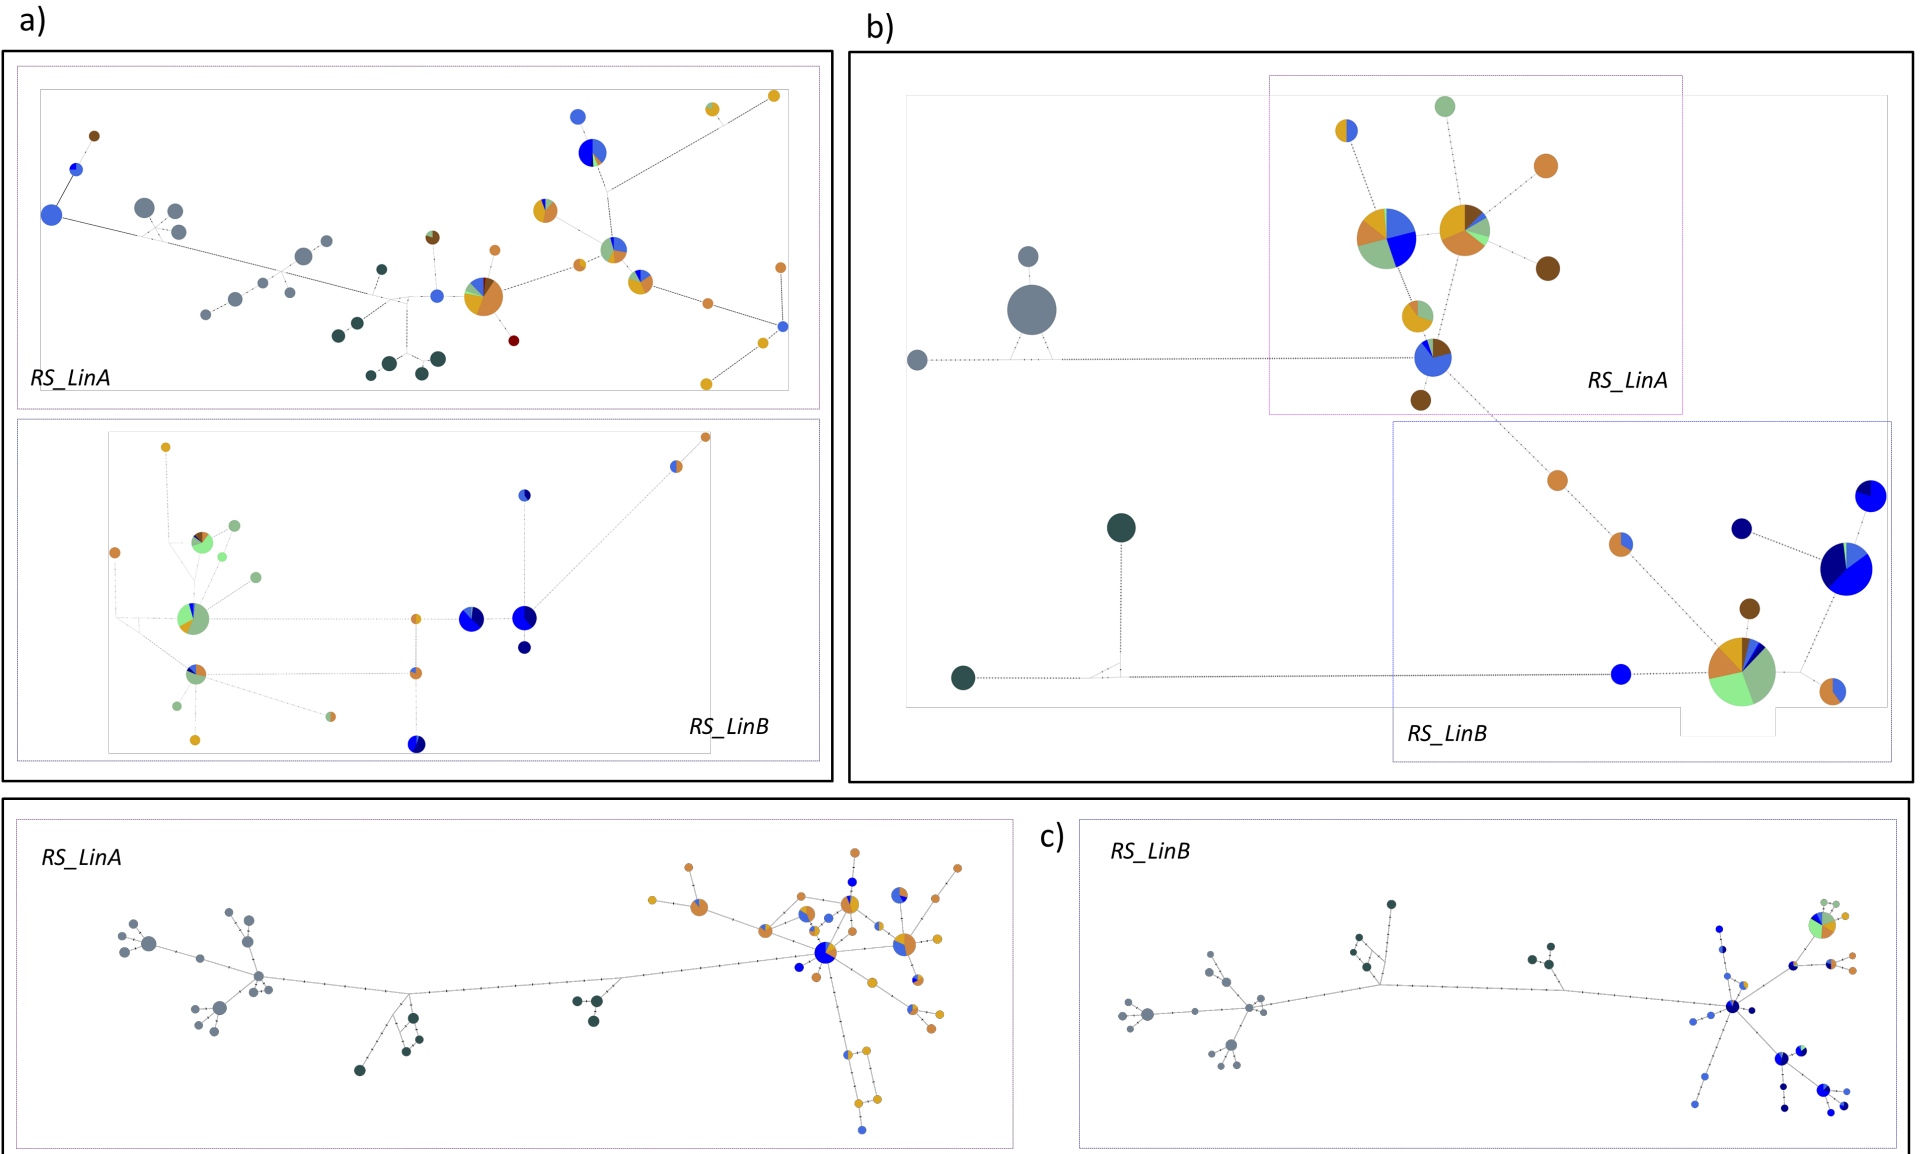

Network trees. a). *atp6-mtORF* b). Control Region (CR) c). *hsp70*. Mutations are indicated as vertical lines.

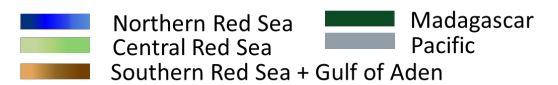



Supplementary Figure S1.

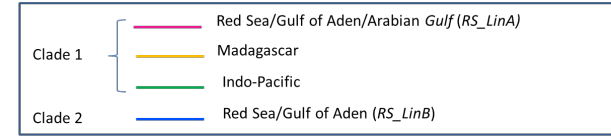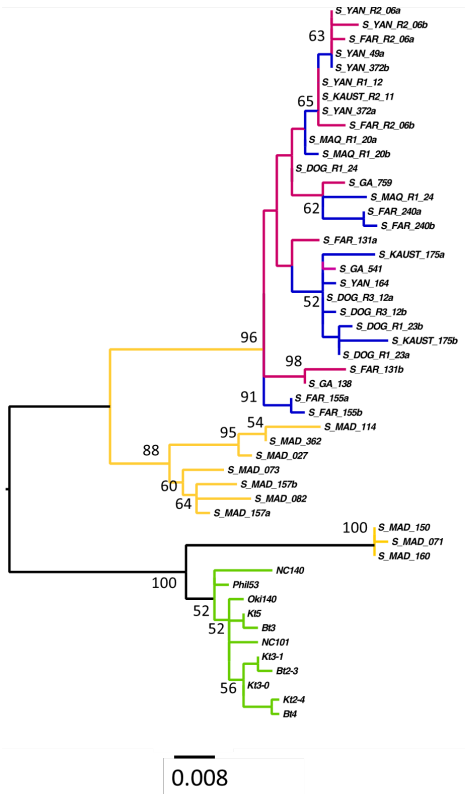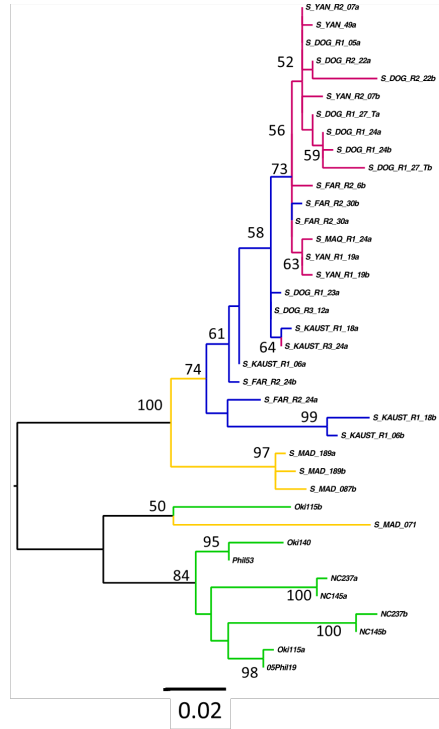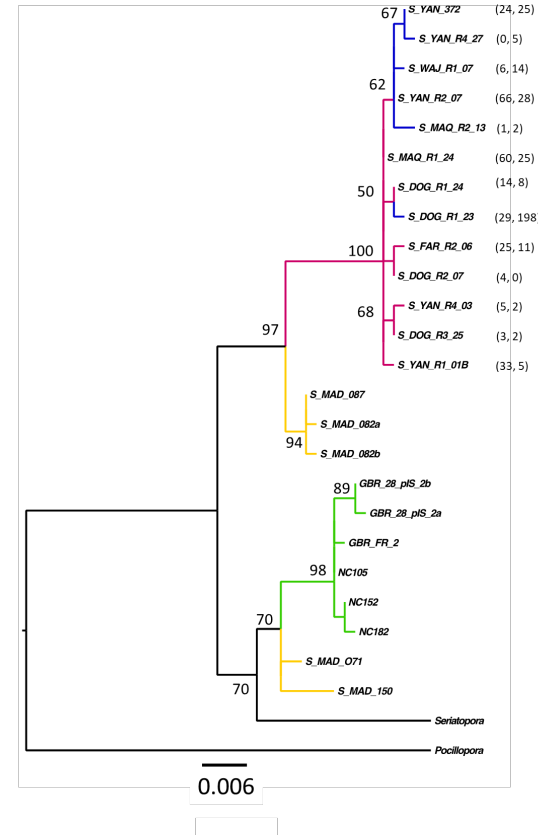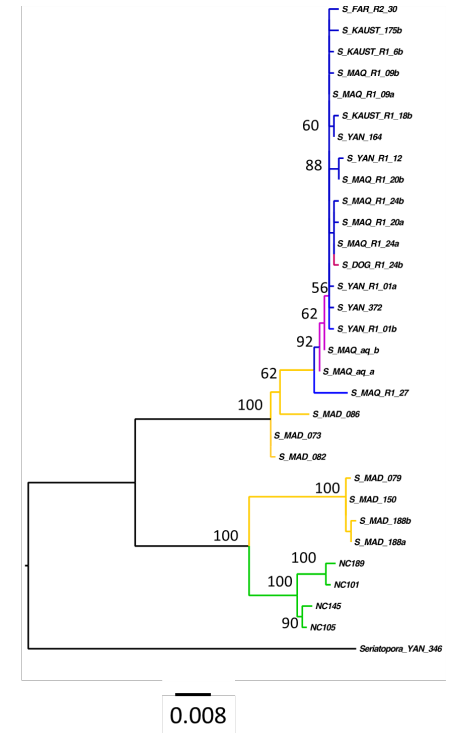

Nuclear phylogenies of the genus *Stylophora*. a). ITS1 b). ITS2 c). *hsp70* d). *PMCA*. Colors and haplotypes names are in agreement with those in the *atp6*-mt*ORF* phylogenies (see legend in Figure 2). In the *hsp70* phylogeny, the number of specimens found per haplotype in each lineage are placed within parentheses (*RS\_LinA*, *RS\_LinB*).

Supplementary Figure S2a.

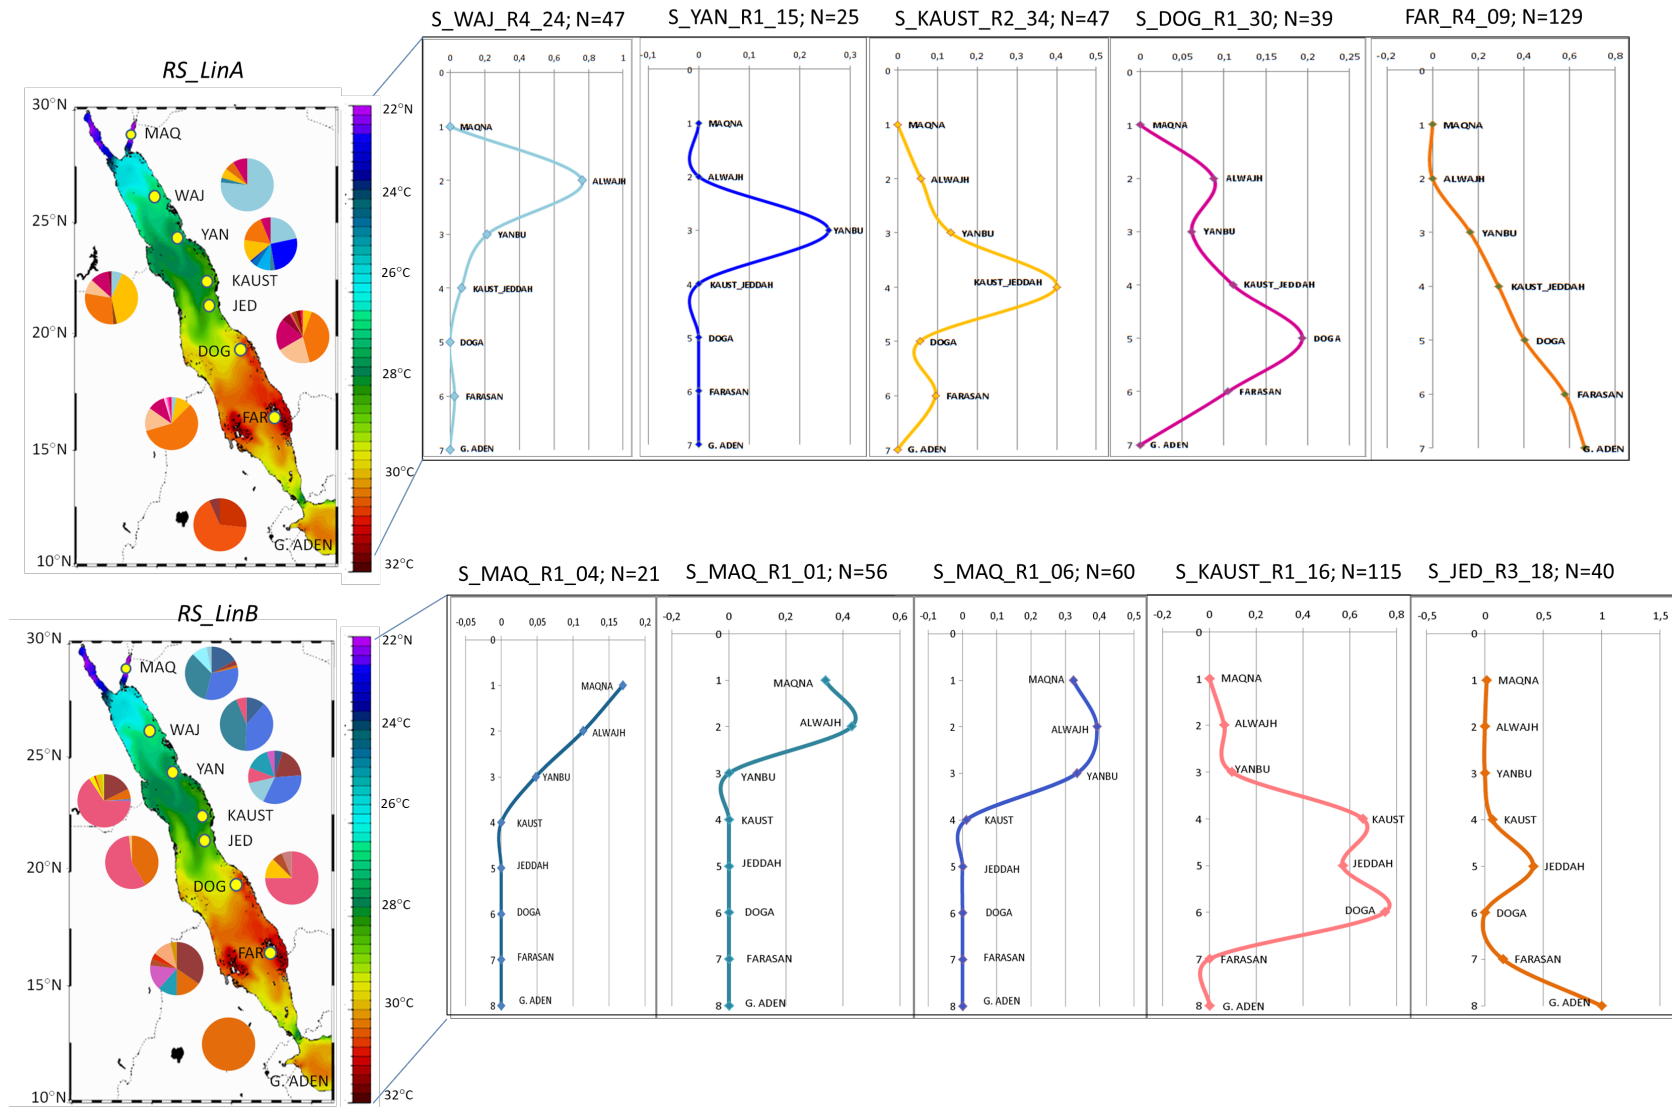

Distribution of haplotype frequencies along the gradient as per mtDNA lineage (*atp6*-*mtORF* locus). Frequencies are indicated for the most common haplotypes. Axis x=relative frequencies.

Supplementary Figure S2b.

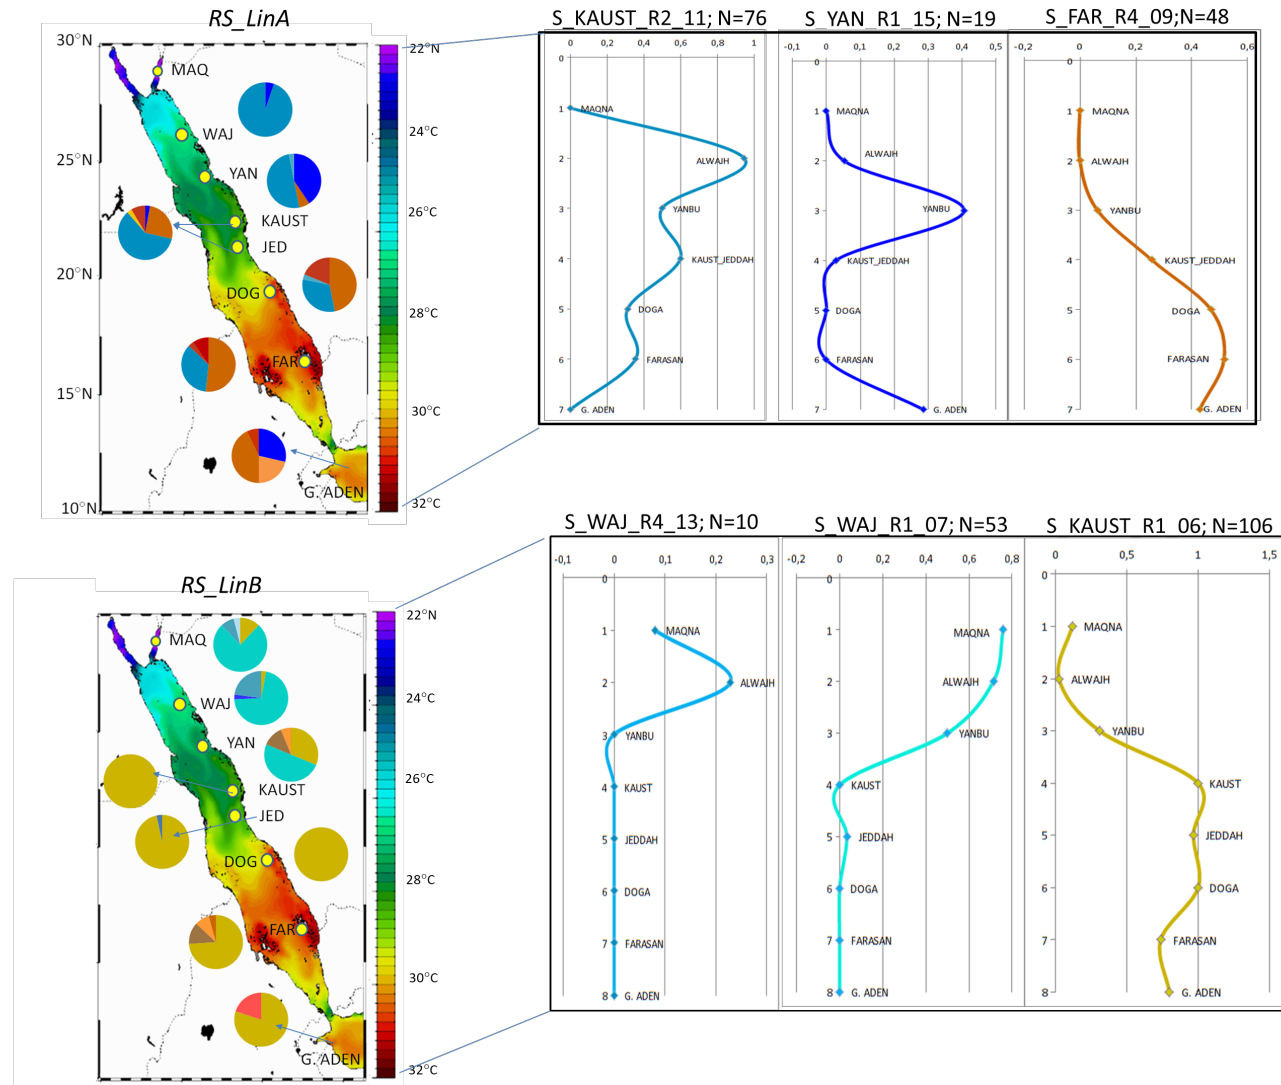

Distribution of haplotype frequencies along the gradient as per mtDNA lineage (CR fragment). Frequencies are indicated for the most common haplotypes. Axis x=relative frequencies.

Supplementary Figure S2c.

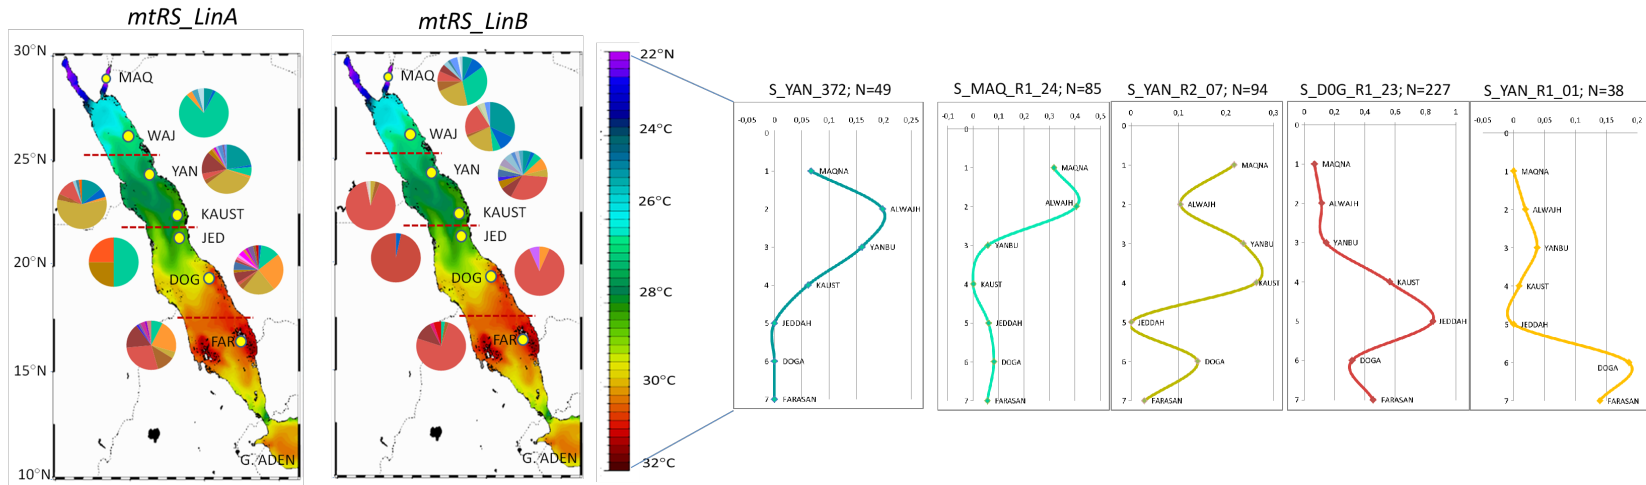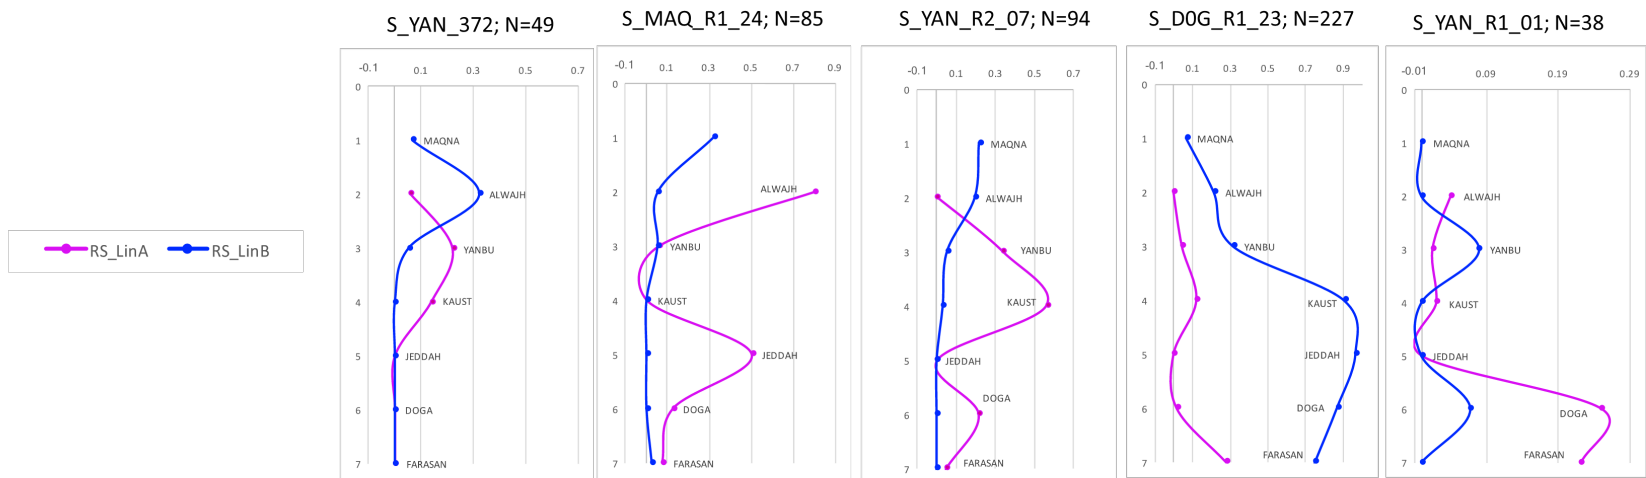

Distribution of haplotype frequencies along the gradient (*hsp70* fragment). Haplotype frequencies of the most common haplotypes (above) and in agreement with mtDNA lineages (below). Axis x=relative frequencies.

Supplementary Figure S3.

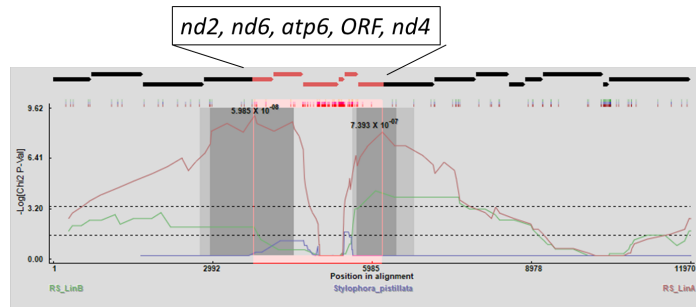

a)

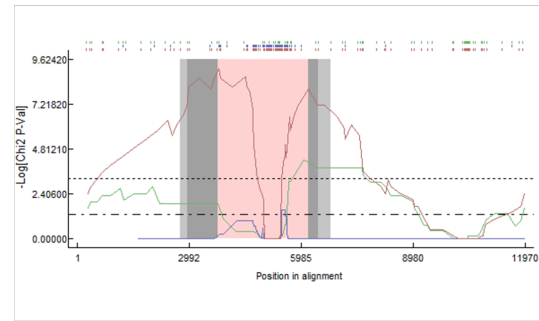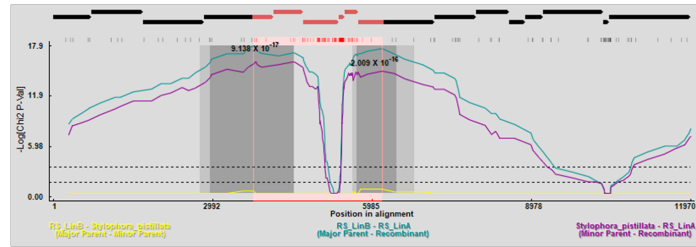

b)

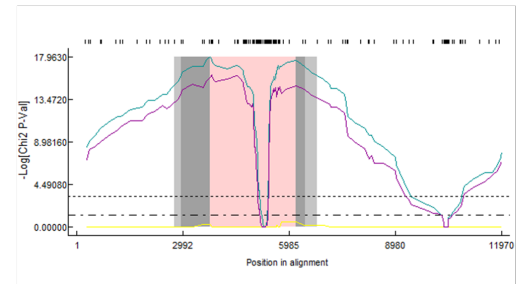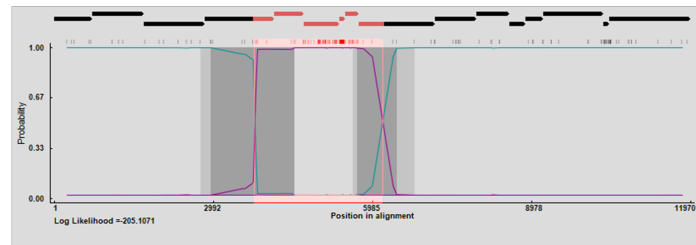

c)

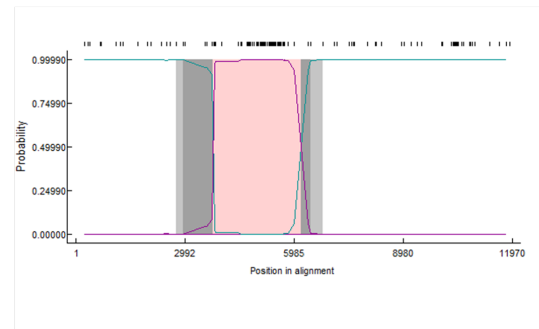

Recombination analyses. Identification of recombinant sequences and estimation of break points by different recombination methods. a). CHIMAERA b). MAXCHI and c) BURT.
